# Supplementary material
Source: publisher figshare collection journal article supplement (https://acs.figshare.com/ndownloader/files/4106437)
Supplement: Supplementary file 1 [file 4106437]

  
data_I 
  
_audit_creation_method            SHELXL-97 
_chemical_name_systematic 
; 
 ? 
; 
_chemical_name_common             ? 
_chemical_melting_point           ? 
_chemical_formula_moiety          ? 
_chemical_formula_sum 
 'C23 H27 N3 O3 S' 
_chemical_formula_weight          425.54 
  
loop_ 
 _atom_type_symbol 
 _atom_type_description 
 _atom_type_scat_dispersion_real 
 _atom_type_scat_dispersion_imag 
 _atom_type_scat_source 
 'C'  'C'   0.0033   0.0016 
 'International Tables Vol C Tables 4.2.6.8 and 6.1.1.4' 
 'H'  'H'   0.0000   0.0000 
 'International Tables Vol C Tables 4.2.6.8 and 6.1.1.4' 
 'N'  'N'   0.0061   0.0033 
 'International Tables Vol C Tables 4.2.6.8 and 6.1.1.4' 
 'O'  'O'   0.0106   0.0060 
 'International Tables Vol C Tables 4.2.6.8 and 6.1.1.4' 
 'S'  'S'   0.1246   0.1234 
 'International Tables Vol C Tables 4.2.6.8 and 6.1.1.4' 
  
_symmetry_cell_setting            triclinic 
_symmetry_space_group_name_H-M    p1 
  
loop_ 
 _symmetry_equiv_pos_as_xyz 
 'x, y, z' 
  
_cell_length_a                    7.2651(6) 
_cell_length_b                    8.983(2) 
_cell_length_c                    10.1090(15) 
_cell_angle_alpha                 97.82(8) 
_cell_angle_beta                  110.42(5) 
_cell_angle_gamma                 112.30(6) 
_cell_volume                      543.92(54) 
_cell_formula_units_Z             1 
_cell_measurement_temperature     293(2) 
_cell_measurement_reflns_used     ? 
_cell_measurement_theta_min       ? 
_cell_measurement_theta_max       ? 
  
_exptl_crystal_description        ? 
_exptl_crystal_colour             ? 
_exptl_crystal_size_max           0.52 
_exptl_crystal_size_mid           0.38 
_exptl_crystal_size_min           0.27 
_exptl_crystal_density_meas       ? 
_exptl_crystal_density_diffrn     1.299 
_exptl_crystal_density_method     'not measured' 
_exptl_crystal_F_000              226 
_exptl_absorpt_coefficient_mu     0.178 
_exptl_absorpt_correction_type    multi-scan 
_exptl_absorpt_correction_T_min   0.9130 
_exptl_absorpt_correction_T_max   0.9534 
_exptl_absorpt_process_details    ? 
  
_exptl_special_details 
; 
 ? 
; 
  
_diffrn_ambient_temperature       293(2) 
_diffrn_radiation_wavelength      0.71073 
_diffrn_radiation_type            MoK\a 
_diffrn_radiation_source          'fine-focus sealed tube' 
_diffrn_radiation_monochromator   graphite 
_diffrn_measurement_device_type   'Bruker P4' 
_diffrn_measurement_method        '\w scans' 
_diffrn_detector_area_resol_mean  ? 
_diffrn_standards_number          ? 
_diffrn_standards_interval_count  ? 
_diffrn_standards_interval_time   ? 
_diffrn_standards_decay_%         ? 
_diffrn_reflns_number             4239 
_diffrn_reflns_av_R_equivalents   0.0258 
_diffrn_reflns_av_sigmaI/netI     0.0511 
_diffrn_reflns_limit_h_min        -9 
_diffrn_reflns_limit_h_max        9 
_diffrn_reflns_limit_k_min        -10 
_diffrn_reflns_limit_k_max        11 
_diffrn_reflns_limit_l_min        -13 
_diffrn_reflns_limit_l_max        11 
_diffrn_reflns_theta_min          2.26 
_diffrn_reflns_theta_max          27.55 
_reflns_number_total              3133 
_reflns_number_gt                 2625 
_reflns_threshold_expression      >2sigma(I) 
  
_computing_data_collection        'Bruker XSCANS' 
_computing_cell_refinement        'Bruker XSCANS' 
_computing_data_reduction         'Bruker SHELXTL' 
_computing_structure_solution     'SHELXS-97 (Sheldrick, 1990)' 
_computing_structure_refinement   'SHELXL-97 (Sheldrick, 1997)' 
_computing_molecular_graphics     'Bruker SHELXTL' 
_computing_publication_material   'Bruker SHELXTL' 
  
_refine_special_details 
; 
 Refinement of F^2^ against ALL reflections.  The weighted R-factor wR and 
 goodness of fit S are based on F^2^, conventional R-factors R are based 
 on F, with F set to zero for negative F^2^. The threshold expression of 
 F^2^ > 2sigma(F^2^) is used only for calculating R-factors(gt) etc. and is 
 not relevant to the choice of reflections for refinement.  R-factors based 
 on F^2^ are statistically about twice as large as those based on F, and R- 
 factors based on ALL data will be even larger. 
; 
  
_refine_ls_structure_factor_coef  Fsqd 
_refine_ls_matrix_type            full 
_refine_ls_weighting_scheme       calc 
_refine_ls_weighting_details 
 'calc w=1/[\s^2^(Fo^2^)+(0.1043P)^2^+0.0964P] where P=(Fo^2^+2Fc^2^)/3' 
_atom_sites_solution_primary      direct 
_atom_sites_solution_secondary    difmap 
_atom_sites_solution_hydrogens    geom 
_refine_ls_hydrogen_treatment     constr 
_refine_ls_extinction_method      none 
_refine_ls_extinction_coef        ? 
_refine_ls_abs_structure_details 
 'Flack H D (1983), Acta Cryst. A39, 876-881' 
_refine_ls_abs_structure_Flack    0.08(14) 
_refine_ls_number_reflns          3133 
_refine_ls_number_parameters      271 
_refine_ls_number_restraints      3 
_refine_ls_R_factor_all           0.0719 
_refine_ls_R_factor_gt            0.0613 
_refine_ls_wR_factor_ref          0.1914 
_refine_ls_wR_factor_gt           0.1740 
_refine_ls_goodness_of_fit_ref    1.110 
_refine_ls_restrained_S_all       1.109 
_refine_ls_shift/su_max           0.000 
_refine_ls_shift/su_mean          0.000 
  
loop_ 
 _atom_site_label 
 _atom_site_type_symbol 
 _atom_site_fract_x 
 _atom_site_fract_y 
 _atom_site_fract_z 
 _atom_site_U_iso_or_equiv 
 _atom_site_adp_type 
 _atom_site_occupancy 
 _atom_site_symmetry_multiplicity 
 _atom_site_calc_flag 
 _atom_site_refinement_flags 
 _atom_site_disorder_assembly 
 _atom_site_disorder_group 
S1 S 0.65950(17) 0.66678(15) 0.02423(13) 0.0456(3) Uani 1 1 d . . . 
C22 C 0.4280(7) 0.4797(6) 0.0000(4) 0.0393(9) Uani 1 1 d . . . 
C23 C 0.4380(8) 0.3257(6) -0.0160(5) 0.0436(10) Uani 1 1 d . . . 
H23A H 0.5645 0.3227 -0.0160 0.052 Uiso 1 1 calc R . . 
C21 C 0.2369(8) 0.4854(6) -0.0008(5) 0.0441(10) Uani 1 1 d . . . 
C20 C 0.0597(8) 0.3344(7) -0.0187(6) 0.0524(12) Uani 1 1 d . . . 
H20A H -0.0683 0.3358 -0.0201 0.063 Uiso 1 1 calc R . . 
N3 N 0.2213(9) 0.6353(7) 0.0140(8) 0.0746(16) Uani 1 1 d . . . 
H3A H 0.3297 0.7271 0.0239 0.089 Uiso 1 1 calc R . . 
H3B H 0.1032 0.6366 0.0133 0.089 Uiso 1 1 calc R . . 
O3 O 0.5851(8) 0.7308(6) -0.0954(6) 0.0833(15) Uani 1 1 d . . . 
C18 C 0.2616(10) 0.1764(6) -0.0319(6) 0.0542(13) Uani 1 1 d . . . 
C19 C 0.0727(9) 0.1823(6) -0.0346(6) 0.0560(14) Uani 1 1 d . . . 
H19A H -0.0470 0.0838 -0.0470 0.067 Uiso 1 1 calc R . . 
O2 O 0.7234(9) 0.7809(6) 0.1655(5) 0.0879(16) Uani 1 1 d . . . 
O1 O 0.8249(8) 0.6162(7) 0.0212(8) 0.107(2) Uani 1 1 d . . . 
C17 C 0.2815(16) 0.0095(8) -0.0443(9) 0.087(2) Uani 1 1 d . . . 
H17A H 0.1473 -0.0802 -0.0545 0.130 Uiso 1 1 calc R . . 
H17B H 0.4033 0.0239 0.0435 0.130 Uiso 1 1 calc R . . 
H17C H 0.3062 -0.0185 -0.1296 0.130 Uiso 1 1 calc R . . 
N2 N 0.9458(7) 0.1487(5) 0.4857(4) 0.0451(9) Uani 1 1 d . . . 
C6 C 1.3677(8) 0.9527(6) 0.5267(5) 0.0441(10) Uani 1 1 d . . . 
C11 C 1.0855(8) 0.4716(6) 0.4549(5) 0.0457(11) Uani 1 1 d . . . 
C9 C 1.2946(8) 0.7853(6) 0.5428(5) 0.0460(11) Uani 1 1 d . . . 
H9A H 1.3510 0.7787 0.6385 0.055 Uiso 1 1 calc R . . 
C13 C 1.0789(9) 0.2865(7) 0.6075(5) 0.0516(12) Uani 1 1 d . . . 
H13A H 1.1242 0.2731 0.7013 0.062 Uiso 1 1 calc R . . 
C8 C 1.3802(8) 1.1495(6) 0.3806(5) 0.0502(12) Uani 1 1 d . . . 
H8A H 1.3348 1.1659 0.2881 0.060 Uiso 1 1 calc R . . 
C3 C 1.5272(8) 1.2935(6) 0.5104(5) 0.0441(10) Uani 1 1 d . . . 
N1 N 1.6033(8) 1.4530(5) 0.5022(5) 0.0546(11) Uani 1 1 d . . . 
C7 C 1.3037(8) 0.9862(6) 0.3894(6) 0.0487(11) Uani 1 1 d . . . 
H7A H 1.2075 0.8959 0.3025 0.058 Uiso 1 1 calc R . . 
C10 C 1.1518(9) 0.6371(6) 0.4322(6) 0.0525(12) Uani 1 1 d . . . 
H10A H 1.0926 0.6413 0.3358 0.063 Uiso 1 1 calc R . . 
C4 C 1.5880(9) 1.2588(6) 0.6486(5) 0.0534(13) Uani 1 1 d . . . 
H4A H 1.6806 1.3487 0.7360 0.064 Uiso 1 1 calc R . . 
C5 C 1.5135(9) 1.0961(6) 0.6561(6) 0.0522(12) Uani 1 1 d . . . 
H5A H 1.5595 1.0792 0.7484 0.063 Uiso 1 1 calc R . . 
C12 C 1.1476(8) 0.4462(6) 0.5937(5) 0.0489(12) Uani 1 1 d . . . 
H12A H 1.2374 0.5395 0.6788 0.059 Uiso 1 1 calc R . . 
C16 C 0.8718(11) -0.0192(7) 0.5047(7) 0.0591(14) Uani 1 1 d . . . 
H16A H 0.9344 -0.0083 0.6085 0.089 Uiso 1 1 calc R . . 
H16B H 0.9191 -0.0845 0.4537 0.089 Uiso 1 1 calc R . . 
H16C H 0.7134 -0.0752 0.4644 0.089 Uiso 1 1 calc R . . 
C15 C 0.9446(10) 0.3243(7) 0.3317(6) 0.0578(14) Uani 1 1 d . . . 
H15A H 0.8947 0.3343 0.2368 0.069 Uiso 1 1 calc R . . 
C14 C 0.8806(10) 0.1687(7) 0.3489(5) 0.0547(13) Uani 1 1 d . . . 
H14A H 0.7901 0.0736 0.2654 0.066 Uiso 1 1 calc R . . 
C2 C 1.5458(11) 1.4885(7) 0.3605(6) 0.0629(15) Uani 1 1 d . . . 
H2B H 1.4453 1.3844 0.2810 0.094 Uiso 1 1 calc R . . 
H2C H 1.6775 1.5435 0.3476 0.094 Uiso 1 1 calc R . . 
H2D H 1.4769 1.5611 0.3597 0.094 Uiso 1 1 calc R . . 
C1 C 1.7521(12) 1.6003(7) 0.6363(6) 0.0665(17) Uani 1 1 d . . . 
H1B H 1.7784 1.5628 0.7225 0.100 Uiso 1 1 calc R . . 
H1C H 1.6851 1.6733 0.6417 0.100 Uiso 1 1 calc R . . 
H1D H 1.8899 1.6609 0.6323 0.100 Uiso 1 1 calc R . . 
  
loop_ 
 _atom_site_aniso_label 
 _atom_site_aniso_U_11 
 _atom_site_aniso_U_22 
 _atom_site_aniso_U_33 
 _atom_site_aniso_U_23 
 _atom_site_aniso_U_13 
 _atom_site_aniso_U_12 
S1 0.0375(5) 0.0471(6) 0.0426(6) 0.0049(4) 0.0158(4) 0.0147(4) 
C22 0.039(2) 0.045(2) 0.032(2) 0.0084(17) 0.0128(16) 0.0210(19) 
C23 0.053(3) 0.047(3) 0.039(2) 0.0118(18) 0.0187(19) 0.032(2) 
C21 0.043(2) 0.043(2) 0.051(3) 0.0166(19) 0.0213(19) 0.024(2) 
C20 0.040(2) 0.053(3) 0.061(3) 0.024(2) 0.023(2) 0.017(2) 
N3 0.061(3) 0.059(3) 0.141(5) 0.046(3) 0.065(3) 0.041(2) 
O3 0.068(3) 0.075(3) 0.088(3) 0.045(3) 0.028(2) 0.014(2) 
C18 0.075(3) 0.040(2) 0.045(3) 0.0132(19) 0.022(2) 0.028(2) 
C19 0.058(3) 0.039(2) 0.054(3) 0.016(2) 0.018(2) 0.011(2) 
O2 0.097(3) 0.056(3) 0.065(3) -0.015(2) 0.043(2) -0.004(2) 
O1 0.054(2) 0.084(3) 0.193(7) 0.030(4) 0.070(3) 0.032(3) 
C17 0.132(7) 0.042(3) 0.093(5) 0.021(3) 0.050(5) 0.045(4) 
N2 0.051(2) 0.040(2) 0.046(2) 0.0133(16) 0.0247(17) 0.0194(18) 
C6 0.039(2) 0.045(3) 0.040(2) 0.0116(18) 0.0134(18) 0.016(2) 
C11 0.049(2) 0.038(2) 0.048(3) 0.0133(19) 0.020(2) 0.019(2) 
C9 0.045(2) 0.047(3) 0.043(2) 0.0147(19) 0.018(2) 0.020(2) 
C13 0.062(3) 0.051(3) 0.033(2) 0.0132(19) 0.013(2) 0.024(3) 
C8 0.059(3) 0.045(3) 0.040(2) 0.0148(19) 0.018(2) 0.020(2) 
C3 0.050(3) 0.040(2) 0.041(2) 0.0140(18) 0.0213(19) 0.018(2) 
N1 0.073(3) 0.040(2) 0.037(2) 0.0117(16) 0.0193(19) 0.018(2) 
C7 0.047(2) 0.044(3) 0.046(2) 0.0101(19) 0.015(2) 0.018(2) 
C10 0.061(3) 0.042(3) 0.049(3) 0.019(2) 0.021(2) 0.019(2) 
C4 0.056(3) 0.044(3) 0.040(2) 0.0080(19) 0.013(2) 0.013(2) 
C5 0.059(3) 0.048(3) 0.044(3) 0.016(2) 0.020(2) 0.020(3) 
C12 0.054(3) 0.039(2) 0.036(2) 0.0067(18) 0.010(2) 0.016(2) 
C16 0.072(3) 0.044(3) 0.069(4) 0.022(2) 0.037(3) 0.027(3) 
C15 0.073(4) 0.051(3) 0.038(2) 0.011(2) 0.020(2) 0.024(3) 
C14 0.067(3) 0.047(3) 0.035(2) 0.0061(19) 0.017(2) 0.020(2) 
C2 0.084(4) 0.049(3) 0.051(3) 0.022(2) 0.029(3) 0.024(3) 
C1 0.087(4) 0.042(3) 0.050(3) 0.009(2) 0.023(3) 0.019(3) 
  
_geom_special_details 
; 
 All esds (except the esd in the dihedral angle between two l.s. planes) 
 are estimated using the full covariance matrix.  The cell esds are taken 
 into account individually in the estimation of esds in distances, angles 
 and torsion angles; correlations between esds in cell parameters are only 
 used when they are defined by crystal symmetry.  An approximate (isotropic) 
 treatment of cell esds is used for estimating esds involving l.s. planes. 
; 
  
loop_ 
 _geom_bond_atom_site_label_1 
 _geom_bond_atom_site_label_2 
 _geom_bond_distance 
 _geom_bond_site_symmetry_2 
 _geom_bond_publ_flag 
S1 O3 1.433(5) . ? 
S1 O2 1.444(4) . ? 
S1 O1 1.445(5) . ? 
S1 C22 1.780(5) . ? 
C22 C23 1.404(6) . ? 
C22 C21 1.406(6) . ? 
C23 C18 1.399(8) . ? 
C23 H23A 0.9300 . ? 
C21 N3 1.386(7) . ? 
C21 C20 1.406(7) . ? 
C20 C19 1.396(8) . ? 
C20 H20A 0.9300 . ? 
N3 H3A 0.8600 . ? 
N3 H3B 0.8600 . ? 
C18 C19 1.385(9) . ? 
C18 C17 1.553(7) . ? 
C19 H19A 0.9300 . ? 
C17 H17A 0.9600 . ? 
C17 H17B 0.9600 . ? 
C17 H17C 0.9600 . ? 
N2 C13 1.353(6) . ? 
N2 C14 1.359(6) . ? 
N2 C16 1.462(7) . ? 
C6 C7 1.415(7) . ? 
C6 C5 1.426(7) . ? 
C6 C9 1.446(7) . ? 
C11 C12 1.396(7) . ? 
C11 C15 1.408(7) . ? 
C11 C10 1.457(7) . ? 
C9 C10 1.355(7) . ? 
C9 H9A 0.9300 . ? 
C13 C12 1.373(7) . ? 
C13 H13A 0.9300 . ? 
C8 C7 1.386(7) . ? 
C8 C3 1.431(7) . ? 
C8 H8A 0.9300 . ? 
C3 N1 1.352(6) . ? 
C3 C4 1.427(7) . ? 
N1 C2 1.462(7) . ? 
N1 C1 1.469(7) . ? 
C7 H7A 0.9300 . ? 
C10 H10A 0.9300 . ? 
C4 C5 1.376(7) . ? 
C4 H4A 0.9300 . ? 
C5 H5A 0.9300 . ? 
C12 H12A 0.9300 . ? 
C16 H16A 0.9600 . ? 
C16 H16B 0.9600 . ? 
C16 H16C 0.9600 . ? 
C15 C14 1.352(8) . ? 
C15 H15A 0.9300 . ? 
C14 H14A 0.9300 . ? 
C2 H2B 0.9600 . ? 
C2 H2C 0.9600 . ? 
C2 H2D 0.9600 . ? 
C1 H1B 0.9600 . ? 
C1 H1C 0.9600 . ? 
C1 H1D 0.9600 . ? 
  
loop_ 
 _geom_angle_atom_site_label_1 
 _geom_angle_atom_site_label_2 
 _geom_angle_atom_site_label_3 
 _geom_angle 
 _geom_angle_site_symmetry_1 
 _geom_angle_site_symmetry_3 
 _geom_angle_publ_flag 
O3 S1 O2 111.5(4) . . ? 
O3 S1 O1 112.7(4) . . ? 
O2 S1 O1 113.8(4) . . ? 
O3 S1 C22 107.1(2) . . ? 
O2 S1 C22 105.0(3) . . ? 
O1 S1 C22 106.1(3) . . ? 
C23 C22 C21 119.8(4) . . ? 
C23 C22 S1 119.6(4) . . ? 
C21 C22 S1 120.6(3) . . ? 
C18 C23 C22 121.4(5) . . ? 
C18 C23 H23A 119.3 . . ? 
C22 C23 H23A 119.3 . . ? 
N3 C21 C22 121.2(5) . . ? 
N3 C21 C20 120.5(5) . . ? 
C22 C21 C20 118.3(4) . . ? 
C19 C20 C21 121.1(5) . . ? 
C19 C20 H20A 119.5 . . ? 
C21 C20 H20A 119.5 . . ? 
C21 N3 H3A 120.0 . . ? 
C21 N3 H3B 120.0 . . ? 
H3A N3 H3B 120.0 . . ? 
C19 C18 C23 118.6(4) . . ? 
C19 C18 C17 121.4(6) . . ? 
C23 C18 C17 120.0(6) . . ? 
C18 C19 C20 120.8(5) . . ? 
C18 C19 H19A 119.6 . . ? 
C20 C19 H19A 119.6 . . ? 
C18 C17 H17A 109.5 . . ? 
C18 C17 H17B 109.5 . . ? 
H17A C17 H17B 109.5 . . ? 
C18 C17 H17C 109.5 . . ? 
H17A C17 H17C 109.5 . . ? 
H17B C17 H17C 109.5 . . ? 
C13 N2 C14 119.6(4) . . ? 
C13 N2 C16 119.0(4) . . ? 
C14 N2 C16 121.4(4) . . ? 
C7 C6 C5 116.5(4) . . ? 
C7 C6 C9 124.4(4) . . ? 
C5 C6 C9 119.1(4) . . ? 
C12 C11 C15 115.9(5) . . ? 
C12 C11 C10 124.4(4) . . ? 
C15 C11 C10 119.7(5) . . ? 
C10 C9 C6 126.4(4) . . ? 
C10 C9 H9A 116.8 . . ? 
C6 C9 H9A 116.8 . . ? 
N2 C13 C12 120.5(4) . . ? 
N2 C13 H13A 119.8 . . ? 
C12 C13 H13A 119.8 . . ? 
C7 C8 C3 121.7(4) . . ? 
C7 C8 H8A 119.2 . . ? 
C3 C8 H8A 119.2 . . ? 
N1 C3 C4 122.1(4) . . ? 
N1 C3 C8 121.8(4) . . ? 
C4 C3 C8 116.1(4) . . ? 
C3 N1 C2 122.1(4) . . ? 
C3 N1 C1 121.4(4) . . ? 
C2 N1 C1 116.4(5) . . ? 
C8 C7 C6 121.9(5) . . ? 
C8 C7 H7A 119.0 . . ? 
C6 C7 H7A 119.0 . . ? 
C9 C10 C11 124.0(5) . . ? 
C9 C10 H10A 118.0 . . ? 
C11 C10 H10A 118.0 . . ? 
C5 C4 C3 121.9(4) . . ? 
C5 C4 H4A 119.0 . . ? 
C3 C4 H4A 119.0 . . ? 
C4 C5 C6 121.9(5) . . ? 
C4 C5 H5A 119.0 . . ? 
C6 C5 H5A 119.0 . . ? 
C13 C12 C11 121.5(4) . . ? 
C13 C12 H12A 119.3 . . ? 
C11 C12 H12A 119.3 . . ? 
N2 C16 H16A 109.5 . . ? 
N2 C16 H16B 109.5 . . ? 
H16A C16 H16B 109.5 . . ? 
N2 C16 H16C 109.5 . . ? 
H16A C16 H16C 109.5 . . ? 
H16B C16 H16C 109.5 . . ? 
C14 C15 C11 121.2(5) . . ? 
C14 C15 H15A 119.4 . . ? 
C11 C15 H15A 119.4 . . ? 
C15 C14 N2 121.3(4) . . ? 
C15 C14 H14A 119.4 . . ? 
N2 C14 H14A 119.4 . . ? 
N1 C2 H2B 109.5 . . ? 
N1 C2 H2C 109.5 . . ? 
H2B C2 H2C 109.5 . . ? 
N1 C2 H2D 109.5 . . ? 
H2B C2 H2D 109.5 . . ? 
H2C C2 H2D 109.5 . . ? 
N1 C1 H1B 109.5 . . ? 
N1 C1 H1C 109.5 . . ? 
H1B C1 H1C 109.5 . . ? 
N1 C1 H1D 109.5 . . ? 
H1B C1 H1D 109.5 . . ? 
H1C C1 H1D 109.5 . . ? 
  
loop_ 
 _geom_torsion_atom_site_label_1 
 _geom_torsion_atom_site_label_2 
 _geom_torsion_atom_site_label_3 
 _geom_torsion_atom_site_label_4 
 _geom_torsion 
 _geom_torsion_site_symmetry_1 
 _geom_torsion_site_symmetry_2 
 _geom_torsion_site_symmetry_3 
 _geom_torsion_site_symmetry_4 
 _geom_torsion_publ_flag 
O3 S1 C22 C23 121.0(4) . . . . ? 
O2 S1 C22 C23 -120.4(4) . . . . ? 
O1 S1 C22 C23 0.4(5) . . . . ? 
O3 S1 C22 C21 -60.0(5) . . . . ? 
O2 S1 C22 C21 58.6(5) . . . . ? 
O1 S1 C22 C21 179.3(4) . . . . ? 
C21 C22 C23 C18 -0.4(7) . . . . ? 
S1 C22 C23 C18 178.6(4) . . . . ? 
C23 C22 C21 N3 -179.7(5) . . . . ? 
S1 C22 C21 N3 1.4(7) . . . . ? 
C23 C22 C21 C20 -0.4(7) . . . . ? 
S1 C22 C21 C20 -179.3(4) . . . . ? 
N3 C21 C20 C19 179.6(6) . . . . ? 
C22 C21 C20 C19 0.4(8) . . . . ? 
C22 C23 C18 C19 1.2(7) . . . . ? 
C22 C23 C18 C17 -178.0(5) . . . . ? 
C23 C18 C19 C20 -1.2(8) . . . . ? 
C17 C18 C19 C20 178.0(6) . . . . ? 
C21 C20 C19 C18 0.5(8) . . . . ? 
C7 C6 C9 C10 -1.8(9) . . . . ? 
C5 C6 C9 C10 177.9(5) . . . . ? 
C14 N2 C13 C12 0.3(8) . . . . ? 
C16 N2 C13 C12 -178.6(5) . . . . ? 
C7 C8 C3 N1 179.5(5) . . . . ? 
C7 C8 C3 C4 -0.6(8) . . . . ? 
C4 C3 N1 C2 178.4(5) . . . . ? 
C8 C3 N1 C2 -1.8(8) . . . . ? 
C4 C3 N1 C1 -0.6(8) . . . . ? 
C8 C3 N1 C1 179.2(5) . . . . ? 
C3 C8 C7 C6 -0.4(8) . . . . ? 
C5 C6 C7 C8 0.7(8) . . . . ? 
C9 C6 C7 C8 -179.6(5) . . . . ? 
C6 C9 C10 C11 179.4(5) . . . . ? 
C12 C11 C10 C9 5.0(9) . . . . ? 
C15 C11 C10 C9 -176.8(6) . . . . ? 
N1 C3 C4 C5 -178.7(5) . . . . ? 
C8 C3 C4 C5 1.4(8) . . . . ? 
C3 C4 C5 C6 -1.2(9) . . . . ? 
C7 C6 C5 C4 0.2(8) . . . . ? 
C9 C6 C5 C4 -179.5(5) . . . . ? 
N2 C13 C12 C11 -0.9(9) . . . . ? 
C15 C11 C12 C13 1.6(8) . . . . ? 
C10 C11 C12 C13 179.9(6) . . . . ? 
C12 C11 C15 C14 -1.9(9) . . . . ? 
C10 C11 C15 C14 179.8(6) . . . . ? 
C11 C15 C14 N2 1.4(10) . . . . ? 
C13 N2 C14 C15 -0.6(9) . . . . ? 
C16 N2 C14 C15 178.3(6) . . . . ? 
  
loop_ 
 _geom_hbond_atom_site_label_D 
 _geom_hbond_atom_site_label_H 
 _geom_hbond_atom_site_label_A 
 _geom_hbond_distance_DH 
 _geom_hbond_distance_HA 
 _geom_hbond_distance_DA 
 _geom_hbond_angle_DHA 
 _geom_hbond_site_symmetry_A 
N3 H3A O2  0.86 2.52 3.049(8) 120.3 . 
N3 H3A O3  0.86 2.53 3.086(8) 122.8 . 
N3 H3B O1  0.86 1.99 2.846(7) 173.1 1_455 
  
_diffrn_measured_fraction_theta_max    0.988 
_diffrn_reflns_theta_full              27.55 
_diffrn_measured_fraction_theta_full   0.988 
_refine_diff_density_max    0.260 
_refine_diff_density_min   -0.320 
_refine_diff_density_rms    0.066 

#===END

 
data_II
 
_audit_creation_method            SHELXL-97 
_chemical_name_systematic 
; 
 ? 
; 
_chemical_name_common             ? 
_chemical_melting_point           ? 
_chemical_formula_moiety          ? 
_chemical_formula_sum 
 'C22 H23 Cl N2 O3 S' 
_chemical_formula_weight          430.93 
 
loop_ 
 _atom_type_symbol 
 _atom_type_description 
 _atom_type_scat_dispersion_real 
 _atom_type_scat_dispersion_imag 
 _atom_type_scat_source 
 'C'  'C'   0.0033   0.0016 
 'International Tables Vol C Tables 4.2.6.8 and 6.1.1.4' 
 'H'  'H'   0.0000   0.0000 
 'International Tables Vol C Tables 4.2.6.8 and 6.1.1.4' 
 'N'  'N'   0.0061   0.0033 
 'International Tables Vol C Tables 4.2.6.8 and 6.1.1.4' 
 'O'  'O'   0.0106   0.0060 
 'International Tables Vol C Tables 4.2.6.8 and 6.1.1.4' 
 'S'  'S'   0.1246   0.1234 
 'International Tables Vol C Tables 4.2.6.8 and 6.1.1.4' 
 'Cl'  'Cl'   0.1484   0.1585 
 'International Tables Vol C Tables 4.2.6.8 and 6.1.1.4' 
 
_symmetry_cell_setting            monoclinic 
_symmetry_space_group_name_H-M    Cc 
 
loop_ 
 _symmetry_equiv_pos_as_xyz 
 'x, y, z' 
 'x, -y, z+1/2' 
 'x+1/2, y+1/2, z' 
 'x+1/2, -y+1/2, z+1/2' 
 
_cell_length_a                    10.363(5) 
_cell_length_b                    11.163(5) 
_cell_length_c                    17.892(6) 
_cell_angle_alpha                 90.00 
_cell_angle_beta                  92.15(3) 
_cell_angle_gamma                 90.00 
_cell_volume                      2068.2(15) 
_cell_formula_units_Z             4 
_cell_measurement_temperature     293(2) 
_cell_measurement_reflns_used     ? 
_cell_measurement_theta_min       ? 
_cell_measurement_theta_max       ? 
 
_exptl_crystal_description        plate 
_exptl_crystal_colour             red 
_exptl_crystal_size_max           0.76 
_exptl_crystal_size_mid           0.62 
_exptl_crystal_size_min           0.11 
_exptl_crystal_density_meas       ? 
_exptl_crystal_density_diffrn     1.384 
_exptl_crystal_density_method     'not measured' 
_exptl_crystal_F_000              904 
_exptl_absorpt_coefficient_mu     0.312 
_exptl_absorpt_correction_type    multi-scan 
_exptl_absorpt_correction_T_min   0.7973 
_exptl_absorpt_correction_T_max   0.9665 
_exptl_absorpt_process_details    ? 
 
_exptl_special_details 
; 
 ? 
; 
 
_diffrn_ambient_temperature       293(2) 
_diffrn_radiation_wavelength      0.71073 
_diffrn_radiation_type            MoK\a 
_diffrn_radiation_source          'fine-focus sealed tube' 
_diffrn_radiation_monochromator   graphite 
_diffrn_measurement_device_type   ? 
_diffrn_measurement_method        ? 
_diffrn_detector_area_resol_mean  ? 
_diffrn_standards_number          ? 
_diffrn_standards_interval_count  ? 
_diffrn_standards_interval_time   ? 
_diffrn_standards_decay_%         ? 
_diffrn_reflns_number             4153 
_diffrn_reflns_av_R_equivalents   0.0000 
_diffrn_reflns_av_sigmaI/netI     0.1250 
_diffrn_reflns_limit_h_min        -12 
_diffrn_reflns_limit_h_max        13 
_diffrn_reflns_limit_k_min        -14 
_diffrn_reflns_limit_k_max        14 
_diffrn_reflns_limit_l_min        -23 
_diffrn_reflns_limit_l_max        23 
_diffrn_reflns_theta_min          2.68 
_diffrn_reflns_theta_max          27.49 
_reflns_number_total              4153 
_reflns_number_gt                 2173 
_reflns_threshold_expression      >2sigma(I) 
 
_computing_data_collection        ? 
_computing_cell_refinement        ? 
_computing_data_reduction         ? 
_computing_structure_solution     'SHELXS-97 (Sheldrick, 1990)' 
_computing_structure_refinement   'SHELXL-97 (Sheldrick, 1997)' 
_computing_molecular_graphics     ? 
_computing_publication_material   ? 
 
_refine_special_details 
; 
 Refinement of F^2^ against ALL reflections.  The weighted R-factor wR and 
 goodness of fit S are based on F^2^, conventional R-factors R are based 
 on F, with F set to zero for negative F^2^. The threshold expression of 
 F^2^ > 2sigma(F^2^) is used only for calculating R-factors(gt) etc. and is 
 not relevant to the choice of reflections for refinement.  R-factors based 
 on F^2^ are statistically about twice as large as those based on F, and R- 
 factors based on ALL data will be even larger. 
; 
 
_refine_ls_structure_factor_coef  Fsqd  
_refine_ls_matrix_type            full 
_refine_ls_weighting_scheme       calc  
_refine_ls_weighting_details 
 'calc w=1/[\s^2^(Fo^2^)+(0.1000P)^2^+0.0000P] where P=(Fo^2^+2Fc^2^)/3' 
_atom_sites_solution_primary      direct 
_atom_sites_solution_secondary    difmap 
_atom_sites_solution_hydrogens    geom 
_refine_ls_hydrogen_treatment     constr 
_refine_ls_extinction_method      SHELXL 
_refine_ls_extinction_coef        0.010(4) 
_refine_ls_extinction_expression 
 'Fc^*^=kFc[1+0.001xFc^2^\l^3^/sin(2\q)]^-1/4^' 
_refine_ls_abs_structure_details 
 'Flack H D (1983), Acta Cryst. A39, 876-881' 
_refine_ls_abs_structure_Flack    0.3(3) 
_refine_ls_number_reflns          4153 
_refine_ls_number_parameters      270 
_refine_ls_number_restraints      2 
_refine_ls_R_factor_all           0.1884 
_refine_ls_R_factor_gt            0.1588 
_refine_ls_wR_factor_ref          0.3980 
_refine_ls_wR_factor_gt           0.3871 
_refine_ls_goodness_of_fit_ref    1.777 
_refine_ls_restrained_S_all       1.777 
_refine_ls_shift/su_max           0.000 
_refine_ls_shift/su_mean          0.000 
 
loop_ 
 _atom_site_label 
 _atom_site_type_symbol 
 _atom_site_fract_x 
 _atom_site_fract_y 
 _atom_site_fract_z 
 _atom_site_U_iso_or_equiv 
 _atom_site_adp_type 
 _atom_site_occupancy 
 _atom_site_symmetry_multiplicity 
 _atom_site_calc_flag 
 _atom_site_refinement_flags 
 _atom_site_disorder_assembly 
 _atom_site_disorder_group 
N1 N 1.1012(16) 0.1322(14) 0.3311(8) 0.078(4) Uani 1 1 d . . . 
C1 C 1.1742(19) 0.1568(14) 0.2599(8) 0.070(5) Uani 1 1 d . . . 
H1A H 1.2134 0.2367 0.2630 0.104 Uiso 1 1 calc R . . 
H1B H 1.1140 0.1531 0.2164 0.104 Uiso 1 1 calc R . . 
H1C H 1.2421 0.0965 0.2548 0.104 Uiso 1 1 calc R . . 
C2 C 1.166(2) 0.1729(14) 0.3939(9) 0.078(6) Uani 1 1 d . . . 
H2A H 1.1336 0.2526 0.4067 0.117 Uiso 1 1 calc R . . 
H2B H 1.2584 0.1779 0.3846 0.117 Uiso 1 1 calc R . . 
H2C H 1.1523 0.1177 0.4354 0.117 Uiso 1 1 calc R . . 
C3 C 0.9790(15) 0.0940(11) 0.3283(7) 0.047(4) Uani 1 1 d . . . 
C4 C 0.9168(13) 0.0552(11) 0.2609(7) 0.045(3) Uani 1 1 d . . . 
H4 H 0.9627 0.0568 0.2159 0.054 Uiso 1 1 calc R . . 
C5 C 0.7956(15) 0.0165(12) 0.2593(8) 0.052(4) Uani 1 1 d . . . 
H5 H 0.7551 -0.0010 0.2120 0.062 Uiso 1 1 calc R . . 
C6 C 0.7242(14) 0.0002(11) 0.3232(7) 0.043(3) Uani 1 1 d . . . 
C7 C 0.7835(17) 0.0345(14) 0.3924(7) 0.061(4) Uani 1 1 d . . . 
H7 H 0.7387 0.0295 0.4377 0.073 Uiso 1 1 calc R . . 
C8 C 0.9114(17) 0.0762(14) 0.3914(8) 0.058(4) Uani 1 1 d . . . 
H8 H 0.9540 0.0933 0.4382 0.069 Uiso 1 1 calc R . . 
C9 C 0.5971(17) -0.0404(12) 0.3207(8) 0.055(4) Uani 1 1 d . . . 
H9 H 0.5650 -0.0596 0.2718 0.066 Uiso 1 1 calc R . . 
C10 C 0.5130(16) -0.0574(11) 0.3728(8) 0.051(4) Uani 1 1 d . . . 
H10 H 0.5440 -0.0385 0.4220 0.061 Uiso 1 1 calc R . . 
C11 C 0.3876(17) -0.0978(13) 0.3682(8) 0.055(4) Uani 1 1 d . . . 
C12 C 0.3259(15) -0.1358(13) 0.2976(8) 0.052(4) Uani 1 1 d . . . 
H12 H 0.3730 -0.1283 0.2533 0.062 Uiso 1 1 calc R . . 
C13 C 0.207(2) -0.1807(18) 0.2922(11) 0.090(7) Uani 1 1 d . . . 
H13 H 0.1712 -0.2063 0.2452 0.108 Uiso 1 1 calc R . . 
C14 C 0.1848(17) -0.1562(14) 0.4188(9) 0.062(4) Uani 1 1 d . . . 
H14 H 0.1367 -0.1595 0.4630 0.074 Uiso 1 1 calc R . . 
C15 C 0.3080(18) -0.1153(13) 0.4230(9) 0.064(4) Uani 1 1 d . . . 
H15 H 0.3414 -0.0968 0.4718 0.076 Uiso 1 1 calc R . . 
C16 C -0.0011(17) -0.2336(16) 0.3529(11) 0.070(5) Uani 1 1 d . . . 
H16A H -0.0330 -0.2437 0.4034 0.105 Uiso 1 1 calc R . . 
H16B H -0.0041 -0.3107 0.3267 0.105 Uiso 1 1 calc R . . 
H16C H -0.0555 -0.1755 0.3253 0.105 Uiso 1 1 calc R . . 
N2 N 0.1327(13) -0.1898(10) 0.3577(7) 0.056(3) Uani 1 1 d . . . 
Cl1 Cl -0.1435(5) 0.2283(6) 0.6064(3) 0.0969(19) Uani 1 1 d . . . 
C18 C 0.0213(16) 0.2289(14) 0.6020(6) 0.051(4) Uani 1 1 d . . . 
C19 C 0.0869(16) 0.1077(13) 0.6000(7) 0.056(4) Uani 1 1 d . . . 
H19 H 0.0371 0.0364 0.6020 0.067 Uiso 1 1 calc R . . 
C20 C 0.2206(16) 0.1012(10) 0.5954(7) 0.048(4) Uani 1 1 d . . . 
H20 H 0.2633 0.0260 0.5994 0.058 Uiso 1 1 calc R . . 
C21 C 0.2906(18) 0.2044(16) 0.5849(15) 0.102(9) Uani 1 1 d . . . 
C22 C 0.2265(15) 0.3104(16) 0.5926(9) 0.056(4) Uani 1 1 d . . . 
H22 H 0.2766 0.3815 0.5966 0.068 Uiso 1 1 calc R . . 
C23 C 0.102(2) 0.3205(17) 0.5949(10) 0.080(6) Uani 1 1 d . . . 
H23 H 0.0654 0.3986 0.5911 0.096 Uiso 1 1 calc R . . 
S1 S 0.4608(4) 0.1910(3) 0.5788(2) 0.0571(12) Uani 1 1 d . . . 
O1 O 0.5113(12) 0.3127(9) 0.5714(6) 0.077(4) Uani 1 1 d . . . 
O2 O 0.5043(12) 0.1306(13) 0.6495(6) 0.053(4) Uani 0.70 1 d P . . 
O3 O 0.4781(13) 0.1242(11) 0.5147(6) 0.086(4) Uani 1 1 d . . . 
O2' O 0.603(3) 0.148(3) 0.570(2) 0.062(9) Uiso 0.30 1 d P . . 
 
loop_ 
 _atom_site_aniso_label 
 _atom_site_aniso_U_11 
 _atom_site_aniso_U_22 
 _atom_site_aniso_U_33 
 _atom_site_aniso_U_23 
 _atom_site_aniso_U_13 
 _atom_site_aniso_U_12 
N1 0.092(12) 0.084(10) 0.056(8) -0.008(7) -0.020(8) -0.026(9) 
C1 0.099(15) 0.060(9) 0.051(9) 0.021(7) 0.009(8) -0.006(9) 
C2 0.124(17) 0.052(8) 0.059(10) 0.018(8) 0.005(10) -0.003(10) 
C3 0.079(11) 0.033(6) 0.028(6) 0.000(5) 0.002(6) -0.019(7) 
C4 0.052(10) 0.054(8) 0.028(6) -0.012(5) 0.001(6) 0.001(7) 
C5 0.057(10) 0.061(8) 0.038(7) -0.014(6) 0.003(6) 0.000(8) 
C6 0.054(10) 0.037(6) 0.037(7) -0.007(6) -0.014(6) 0.011(8) 
C7 0.085(13) 0.072(10) 0.026(6) -0.028(6) 0.011(7) -0.014(9) 
C8 0.078(13) 0.057(8) 0.038(8) -0.003(6) 0.000(7) 0.012(8) 
C9 0.073(12) 0.035(6) 0.056(9) -0.024(6) -0.007(8) 0.000(7) 
C10 0.077(13) 0.027(6) 0.049(8) 0.000(5) -0.002(8) 0.002(7) 
C11 0.073(12) 0.046(7) 0.045(8) -0.005(6) -0.009(8) 0.017(8) 
C12 0.052(10) 0.061(9) 0.044(8) -0.013(7) 0.014(7) 0.004(8) 
C13 0.11(2) 0.086(12) 0.077(13) -0.025(10) 0.037(12) 0.015(13) 
C14 0.057(11) 0.065(10) 0.063(10) 0.007(8) 0.007(8) -0.003(8) 
C15 0.093(14) 0.050(8) 0.048(8) 0.001(7) -0.001(9) 0.001(9) 
C16 0.060(11) 0.069(10) 0.082(12) 0.033(9) 0.018(9) 0.000(9) 
N2 0.075(10) 0.052(7) 0.041(7) -0.004(6) -0.004(6) -0.001(7) 
Cl1 0.084(4) 0.134(5) 0.074(3) 0.020(3) 0.018(3) 0.008(4) 
C18 0.074(12) 0.073(9) 0.006(4) -0.006(5) 0.000(6) 0.013(8) 
C19 0.076(12) 0.057(8) 0.034(7) 0.019(6) -0.001(7) -0.024(8) 
C20 0.074(12) 0.021(6) 0.050(8) 0.016(5) 0.010(7) -0.007(7) 
C21 0.061(12) 0.068(11) 0.17(2) -0.092(13) -0.056(13) 0.029(10) 
C22 0.032(9) 0.072(11) 0.066(10) 0.003(8) 0.016(7) 0.008(8) 
C23 0.107(19) 0.063(10) 0.069(12) 0.032(9) 0.005(11) 0.029(11) 
S1 0.081(3) 0.060(2) 0.0303(15) -0.0062(17) 0.0017(16) -0.005(2) 
O1 0.128(12) 0.043(5) 0.064(7) 0.002(5) 0.052(7) -0.022(6) 
O2 0.051(9) 0.085(10) 0.024(6) 0.012(6) -0.006(6) 0.001(8) 
O3 0.115(10) 0.092(9) 0.050(6) -0.036(6) -0.012(6) 0.008(7) 
 
_geom_special_details 
; 
 All esds (except the esd in the dihedral angle between two l.s. planes) 
 are estimated using the full covariance matrix.  The cell esds are taken 
 into account individually in the estimation of esds in distances, angles 
 and torsion angles; correlations between esds in cell parameters are only 
 used when they are defined by crystal symmetry.  An approximate (isotropic) 
 treatment of cell esds is used for estimating esds involving l.s. planes. 
; 
 
loop_ 
 _geom_bond_atom_site_label_1 
 _geom_bond_atom_site_label_2 
 _geom_bond_distance 
 _geom_bond_site_symmetry_2 
 _geom_bond_publ_flag 
N1 C3 1.336(19) . ? 
N1 C2 1.36(2) . ? 
N1 C1 1.53(2) . ? 
C1 H1A 0.9800 . ? 
C1 H1B 0.9800 . ? 
C1 H1C 0.9800 . ? 
C2 H2A 0.9800 . ? 
C2 H2B 0.9800 . ? 
C2 H2C 0.9800 . ? 
C3 C8 1.366(18) . ? 
C3 C4 1.413(17) . ? 
C4 C5 1.328(19) . ? 
C4 H4 0.9500 . ? 
C5 C6 1.397(18) . ? 
C5 H5 0.9500 . ? 
C6 C9 1.392(19) . ? 
C6 C7 1.414(17) . ? 
C7 C8 1.41(2) . ? 
C7 H7 0.9500 . ? 
C8 H8 0.9500 . ? 
C9 C10 1.313(19) . ? 
C9 H9 0.9500 . ? 
C10 C11 1.38(2) . ? 
C10 H10 0.9500 . ? 
C11 C15 1.32(2) . ? 
C11 C12 1.456(18) . ? 
C12 C13 1.33(2) . ? 
C12 H12 0.9500 . ? 
C13 N2 1.43(2) . ? 
C13 H13 0.9500 . ? 
C14 N2 1.258(19) . ? 
C14 C15 1.36(2) . ? 
C14 H14 0.9500 . ? 
C15 H15 0.9500 . ? 
C16 N2 1.47(2) . ? 
C16 H16A 0.9800 . ? 
C16 H16B 0.9800 . ? 
C16 H16C 0.9800 . ? 
Cl1 C18 1.713(18) . ? 
C18 C23 1.33(2) . ? 
C18 C19 1.51(2) . ? 
C19 C20 1.393(18) . ? 
C19 H19 0.9500 . ? 
C20 C21 1.38(2) . ? 
C20 H20 0.9500 . ? 
C21 C22 1.37(2) . ? 
C21 S1 1.78(2) . ? 
C22 C23 1.30(2) . ? 
C22 H22 0.9500 . ? 
C23 H23 0.9500 . ? 
S1 O3 1.385(10) . ? 
S1 O2 1.488(12) . ? 
S1 O1 1.464(10) . ? 
S1 O2' 1.56(4) . ? 
O2 O2' 1.79(4) . ? 
O3 O2' 1.62(4) . ? 
 
loop_ 
 _geom_angle_atom_site_label_1 
 _geom_angle_atom_site_label_2 
 _geom_angle_atom_site_label_3 
 _geom_angle 
 _geom_angle_site_symmetry_1 
 _geom_angle_site_symmetry_3 
 _geom_angle_publ_flag 
C3 N1 C2 125.0(16) . . ? 
C3 N1 C1 121.6(12) . . ? 
C2 N1 C1 112.4(15) . . ? 
N1 C1 H1A 109.5 . . ? 
N1 C1 H1B 109.5 . . ? 
H1A C1 H1B 109.5 . . ? 
N1 C1 H1C 109.5 . . ? 
H1A C1 H1C 109.5 . . ? 
H1B C1 H1C 109.5 . . ? 
N1 C2 H2A 109.5 . . ? 
N1 C2 H2B 109.5 . . ? 
H2A C2 H2B 109.5 . . ? 
N1 C2 H2C 109.5 . . ? 
H2A C2 H2C 109.5 . . ? 
H2B C2 H2C 109.5 . . ? 
N1 C3 C8 122.0(13) . . ? 
N1 C3 C4 122.1(12) . . ? 
C8 C3 C4 115.5(14) . . ? 
C5 C4 C3 121.2(13) . . ? 
C5 C4 H4 119.4 . . ? 
C3 C4 H4 119.4 . . ? 
C4 C5 C6 123.7(13) . . ? 
C4 C5 H5 118.2 . . ? 
C6 C5 H5 118.2 . . ? 
C9 C6 C5 123.1(13) . . ? 
C9 C6 C7 119.7(14) . . ? 
C5 C6 C7 117.1(13) . . ? 
C8 C7 C6 117.2(12) . . ? 
C8 C7 H7 121.4 . . ? 
C6 C7 H7 121.4 . . ? 
C7 C8 C3 124.8(14) . . ? 
C7 C8 H8 117.6 . . ? 
C3 C8 H8 117.6 . . ? 
C10 C9 C6 132.7(14) . . ? 
C10 C9 H9 113.7 . . ? 
C6 C9 H9 113.7 . . ? 
C9 C10 C11 131.1(14) . . ? 
C9 C10 H10 114.5 . . ? 
C11 C10 H10 114.5 . . ? 
C15 C11 C10 128.4(15) . . ? 
C15 C11 C12 109.6(16) . . ? 
C10 C11 C12 122.0(14) . . ? 
C13 C12 C11 123.2(14) . . ? 
C13 C12 H12 118.4 . . ? 
C11 C12 H12 118.4 . . ? 
N2 C13 C12 119.5(17) . . ? 
N2 C13 H13 120.3 . . ? 
C12 C13 H13 120.3 . . ? 
N2 C14 C15 121.4(16) . . ? 
N2 C14 H14 119.3 . . ? 
C15 C14 H14 119.3 . . ? 
C11 C15 C14 128.6(16) . . ? 
C11 C15 H15 115.7 . . ? 
C14 C15 H15 115.7 . . ? 
N2 C16 H16A 109.5 . . ? 
N2 C16 H16B 109.5 . . ? 
H16A C16 H16B 109.5 . . ? 
N2 C16 H16C 109.5 . . ? 
H16A C16 H16C 109.5 . . ? 
H16B C16 H16C 109.5 . . ? 
C14 N2 C13 117.7(17) . . ? 
C14 N2 C16 121.6(15) . . ? 
C13 N2 C16 120.6(16) . . ? 
C23 C18 C19 113.7(16) . . ? 
C23 C18 Cl1 129.5(14) . . ? 
C19 C18 Cl1 116.5(13) . . ? 
C20 C19 C18 119.7(14) . . ? 
C20 C19 H19 120.1 . . ? 
C18 C19 H19 120.1 . . ? 
C21 C20 C19 119.6(14) . . ? 
C21 C20 H20 120.2 . . ? 
C19 C20 H20 120.2 . . ? 
C20 C21 C22 116.8(19) . . ? 
C20 C21 S1 117.8(13) . . ? 
C22 C21 S1 124.5(15) . . ? 
C23 C22 C21 124(2) . . ? 
C23 C22 H22 117.8 . . ? 
C21 C22 H22 117.8 . . ? 
C22 C23 C18 124.3(19) . . ? 
C22 C23 H23 117.9 . . ? 
C18 C23 H23 117.9 . . ? 
O3 S1 O2 114.5(8) . . ? 
O3 S1 O1 111.5(7) . . ? 
O2 S1 O1 113.6(8) . . ? 
O3 S1 O2' 66.5(14) . . ? 
O2 S1 O2' 71.9(14) . . ? 
O1 S1 O2' 86.1(14) . . ? 
O3 S1 C21 104.8(8) . . ? 
O2 S1 C21 104.8(11) . . ? 
O1 S1 C21 106.6(9) . . ? 
O2' S1 C21 166.9(15) . . ? 
S1 O2 O2' 55.9(12) . . ? 
S1 O3 O2' 61.9(14) . . ? 
S1 O2' O3 51.5(12) . . ? 
S1 O2' O2 52.2(12) . . ? 
O3 O2' O2 90.0(18) . . ? 
 
_diffrn_measured_fraction_theta_max    0.950 
_diffrn_reflns_theta_full              27.49 
_diffrn_measured_fraction_theta_full   0.950 
_refine_diff_density_max    0.908 
_refine_diff_density_min   -1.053 
_refine_diff_density_rms    0.198 

#===END

  
data_III 
  
_audit_creation_method            SHELXL-97 
_chemical_name_systematic 
; 
 ? 
; 
_chemical_name_common             ? 
_chemical_melting_point           ? 
_chemical_formula_moiety          ? 
_chemical_formula_sum 
 'C22 H26 N2 O5 S' 
_chemical_formula_weight          430.51 
  
loop_ 
 _atom_type_symbol 
 _atom_type_description 
 _atom_type_scat_dispersion_real 
 _atom_type_scat_dispersion_imag 
 _atom_type_scat_source 
 'C'  'C'   0.0033   0.0016 
 'International Tables Vol C Tables 4.2.6.8 and 6.1.1.4' 
 'H'  'H'   0.0000   0.0000 
 'International Tables Vol C Tables 4.2.6.8 and 6.1.1.4' 
 'N'  'N'   0.0061   0.0033 
 'International Tables Vol C Tables 4.2.6.8 and 6.1.1.4' 
 'O'  'O'   0.0106   0.0060 
 'International Tables Vol C Tables 4.2.6.8 and 6.1.1.4' 
 'S'  'S'   0.1246   0.1234 
 'International Tables Vol C Tables 4.2.6.8 and 6.1.1.4' 
  
_symmetry_cell_setting            Monoclinic 
_symmetry_space_group_name_H-M    P2(1)/c 
  
loop_ 
 _symmetry_equiv_pos_as_xyz 
 'x, y, z' 
 '-x, y+1/2, -z+1/2' 
 '-x, -y, -z' 
 'x, -y-1/2, z-1/2' 
  
_cell_length_a                    14.208(6) 
_cell_length_b                    10.027(4) 
_cell_length_c                    16.146(7) 
_cell_angle_alpha                 90.00 
_cell_angle_beta                  113.042(6) 
_cell_angle_gamma                 90.00 
_cell_volume                      2116.7(15) 
_cell_formula_units_Z             4 
_cell_measurement_temperature     293(2) 
_cell_measurement_reflns_used     ? 
_cell_measurement_theta_min       ? 
_cell_measurement_theta_max       ? 
  
_exptl_crystal_description        ? 
_exptl_crystal_colour             ? 
_exptl_crystal_size_max           0.48 
_exptl_crystal_size_mid           0.33 
_exptl_crystal_size_min           0.29 
_exptl_crystal_density_meas       ? 
_exptl_crystal_density_diffrn     1.351 
_exptl_crystal_density_method     'not measured' 
_exptl_crystal_F_000              912 
_exptl_absorpt_coefficient_mu     0.190 
_exptl_absorpt_correction_type    none 
_exptl_absorpt_correction_T_min   0.9145 
_exptl_absorpt_correction_T_max   0.9471 
_exptl_absorpt_process_details    ? 
  
_exptl_special_details 
; 
 ? 
; 
  
_diffrn_ambient_temperature       293(2) 
_diffrn_radiation_wavelength      0.71073 
_diffrn_radiation_type            MoK\a 
_diffrn_radiation_source          'fine-focus sealed tube' 
_diffrn_radiation_monochromator   graphite 
_diffrn_measurement_device_type   'Bruker P4' 
_diffrn_measurement_method        '\w scans' 
_diffrn_detector_area_resol_mean  ? 
_diffrn_standards_number          ? 
_diffrn_standards_interval_count  ? 
_diffrn_standards_interval_time   ? 
_diffrn_standards_decay_%         ? 
_diffrn_reflns_number             16091 
_diffrn_reflns_av_R_equivalents   0.0246 
_diffrn_reflns_av_sigmaI/netI     0.0261 
_diffrn_reflns_limit_h_min        -18 
_diffrn_reflns_limit_h_max        18 
_diffrn_reflns_limit_k_min        -12 
_diffrn_reflns_limit_k_max        13 
_diffrn_reflns_limit_l_min        -14 
_diffrn_reflns_limit_l_max        20 
_diffrn_reflns_theta_min          2.56 
_diffrn_reflns_theta_max          27.50 
_reflns_number_total              4787 
_reflns_number_gt                 3715 
_reflns_threshold_expression      >2sigma(I) 
  
_computing_data_collection        'Bruker XSCANS' 
_computing_cell_refinement        'Bruker XSCANS' 
_computing_data_reduction         'Bruker SHELXTL' 
_computing_structure_solution     'SHELXS-97 (Sheldrick, 1990)' 
_computing_structure_refinement   'SHELXL-97 (Sheldrick, 1997)' 
_computing_molecular_graphics     'Bruker SHELXTL' 
_computing_publication_material   'Bruker SHELXTL' 
  
_refine_special_details 
; 
 Refinement of F^2^ against ALL reflections.  The weighted R-factor wR and 
 goodness of fit S are based on F^2^, conventional R-factors R are based 
 on F, with F set to zero for negative F^2^. The threshold expression of 
 F^2^ > 2sigma(F^2^) is used only for calculating R-factors(gt) etc. and is 
 not relevant to the choice of reflections for refinement.  R-factors based 
 on F^2^ are statistically about twice as large as those based on F, and R- 
 factors based on ALL data will be even larger. 
; 
  
_refine_ls_structure_factor_coef  Fsqd 
_refine_ls_matrix_type            full 
_refine_ls_weighting_scheme       calc 
_refine_ls_weighting_details 
 'calc w=1/[\s^2^(Fo^2^)+(0.1349P)^2^+0.7609P] where P=(Fo^2^+2Fc^2^)/3' 
_atom_sites_solution_primary      direct 
_atom_sites_solution_secondary    difmap 
_atom_sites_solution_hydrogens    geom 
_refine_ls_hydrogen_treatment     mixed 
_refine_ls_extinction_method      none 
_refine_ls_extinction_coef        ? 
_refine_ls_number_reflns          4787 
_refine_ls_number_parameters      311 
_refine_ls_number_restraints      0 
_refine_ls_R_factor_all           0.0848 
_refine_ls_R_factor_gt            0.0680 
_refine_ls_wR_factor_ref          0.2228 
_refine_ls_wR_factor_gt           0.2040 
_refine_ls_goodness_of_fit_ref    1.038 
_refine_ls_restrained_S_all       1.038 
_refine_ls_shift/su_max           0.000 
_refine_ls_shift/su_mean          0.000 
  
loop_ 
 _atom_site_label 
 _atom_site_type_symbol 
 _atom_site_fract_x 
 _atom_site_fract_y 
 _atom_site_fract_z 
 _atom_site_U_iso_or_equiv 
 _atom_site_adp_type 
 _atom_site_occupancy 
 _atom_site_symmetry_multiplicity 
 _atom_site_calc_flag 
 _atom_site_refinement_flags 
 _atom_site_disorder_assembly 
 _atom_site_disorder_group 
S1 S 0.82904(5) -0.21464(6) 0.22911(4) 0.0508(2) Uani 1 1 d . . . 
N1 N 0.56474(18) 0.2626(2) 0.40571(17) 0.0584(6) Uani 1 1 d . . . 
C12 C 0.60546(18) 0.2782(2) 0.34290(17) 0.0456(6) Uani 1 1 d . . . 
N2 N 0.90294(16) 0.3249(2) -0.08351(14) 0.0494(5) Uani 1 1 d . . . 
C18 C 0.8350(2) -0.2793(3) 0.39573(17) 0.0466(6) Uani 1 1 d . . . 
C17 C 0.77520(18) -0.2310(2) 0.31021(16) 0.0418(5) Uani 1 1 d . . . 
C4 C 0.82351(19) 0.2780(3) 0.04682(18) 0.0501(6) Uani 1 1 d . . . 
C21 C 0.6333(2) -0.2116(3) 0.35427(19) 0.0538(6) Uani 1 1 d . . . 
O5 O 0.64806(18) -0.2662(3) 0.49925(16) 0.0814(7) Uani 1 1 d . . . 
H5B H 0.6878 -0.3008 0.5458 0.122 Uiso 1 1 calc R . . 
C9 C 0.69486(18) 0.3113(3) 0.21484(18) 0.0505(6) Uani 1 1 d . . . 
C19 C 0.7945(2) -0.2920(3) 0.45994(18) 0.0498(6) Uani 1 1 d . . . 
C13 C 0.62696(19) 0.1677(3) 0.29893(18) 0.0489(6) Uani 1 1 d . . . 
H13A H 0.6114 0.0822 0.3120 0.059 Uiso 1 1 calc R . . 
C14 C 0.6704(2) 0.1842(3) 0.23728(18) 0.0512(6) Uani 1 1 d . . . 
H14A H 0.6840 0.1094 0.2096 0.061 Uiso 1 1 calc R . . 
C20 C 0.6931(2) -0.2566(3) 0.43990(18) 0.0511(6) Uani 1 1 d . . . 
C10 C 0.6705(2) 0.4198(3) 0.2567(2) 0.0559(7) Uani 1 1 d . . . 
C6 C 0.8922(2) 0.2005(3) -0.0586(2) 0.0536(6) Uani 1 1 d . . . 
C7 C 0.7791(2) 0.2462(3) 0.11199(19) 0.0541(6) Uani 1 1 d . . . 
H7A H 0.7753 0.1569 0.1261 0.065 Uiso 1 1 calc R . . 
C8 C 0.7438(2) 0.3367(3) 0.15231(18) 0.0550(6) Uani 1 1 d . . . 
H8A H 0.7510 0.4255 0.1393 0.066 Uiso 1 1 calc R . . 
C11 C 0.6275(2) 0.4054(3) 0.31825(19) 0.0534(6) Uani 1 1 d . . . 
C22 C 0.6741(2) -0.1981(3) 0.29075(18) 0.0484(6) Uani 1 1 d . . . 
O3 O 0.7658(2) -0.1198(2) 0.16338(16) 0.0875(8) Uani 1 1 d . . . 
C5 C 0.8534(2) 0.1758(3) 0.00516(19) 0.0556(6) Uani 1 1 d . . . 
H5A H 0.8471 0.0881 0.0209 0.067 Uiso 1 1 calc R . . 
C3 C 0.8353(2) 0.4077(3) 0.0196(2) 0.0595(7) Uani 1 1 d . . . 
O2 O 0.8270(2) -0.3431(2) 0.18997(17) 0.0807(7) Uani 1 1 d . . . 
C2 C 0.8738(2) 0.4284(3) -0.0449(2) 0.0602(7) Uani 1 1 d . . . 
H2B H 0.8801 0.5151 -0.0626 0.072 Uiso 1 1 calc R . . 
C1 C 0.9449(3) 0.3480(4) -0.1521(2) 0.0694(8) Uani 1 1 d . . . 
H1A H 0.9611 0.2639 -0.1718 0.104 Uiso 1 1 calc R . . 
H1B H 1.0058 0.4010 -0.1269 0.104 Uiso 1 1 calc R . . 
H1C H 0.8953 0.3940 -0.2024 0.104 Uiso 1 1 calc R . . 
C16 C 0.5465(2) 0.3768(3) 0.4527(2) 0.0684(8) Uani 1 1 d . . . 
H16A H 0.5674 0.4568 0.4320 0.103 Uiso 1 1 calc R . . 
H16B H 0.5850 0.3670 0.5163 0.103 Uiso 1 1 calc R . . 
H16C H 0.4749 0.3822 0.4410 0.103 Uiso 1 1 calc R . . 
C15 C 0.5366(3) 0.1331(3) 0.4282(2) 0.0698(8) Uani 1 1 d . . . 
H15A H 0.5530 0.0657 0.3937 0.105 Uiso 1 1 calc R . . 
H15B H 0.4645 0.1313 0.4146 0.105 Uiso 1 1 calc R . . 
H15C H 0.5737 0.1162 0.4912 0.105 Uiso 1 1 calc R . . 
O4 O 1.0137(3) -0.0130(3) 0.1709(2) 0.0854(8) Uani 1 1 d . . . 
O1 O 0.9313(2) -0.1658(3) 0.27722(18) 0.0998(10) Uani 1 1 d . . . 
H19 H 0.837(2) -0.321(3) 0.519(2) 0.056(8) Uiso 1 1 d . . . 
H22 H 0.628(2) -0.161(3) 0.233(2) 0.071(9) Uiso 1 1 d . . . 
H21 H 0.564(2) -0.183(3) 0.342(2) 0.068(9) Uiso 1 1 d . . . 
H18 H 0.905(2) -0.297(3) 0.412(2) 0.064(9) Uiso 1 1 d . . . 
H11 H 0.610(2) 0.485(3) 0.3458(19) 0.061(8) Uiso 1 1 d . . . 
H3 H 0.811(3) 0.470(4) 0.040(2) 0.074(10) Uiso 1 1 d . . . 
H10 H 0.682(2) 0.509(3) 0.241(2) 0.067(9) Uiso 1 1 d . . . 
H6 H 0.915(2) 0.133(3) -0.090(2) 0.066(9) Uiso 1 1 d . . . 
H4B H 0.987(4) -0.051(5) 0.198(3) 0.113(17) Uiso 1 1 d . . . 
H4A H 1.050(4) 0.046(6) 0.206(3) 0.115(18) Uiso 1 1 d . . . 
  
loop_ 
 _atom_site_aniso_label 
 _atom_site_aniso_U_11 
 _atom_site_aniso_U_22 
 _atom_site_aniso_U_33 
 _atom_site_aniso_U_23 
 _atom_site_aniso_U_13 
 _atom_site_aniso_U_12 
S1 0.0683(4) 0.0446(4) 0.0489(4) -0.0043(2) 0.0331(3) -0.0077(3) 
N1 0.0638(14) 0.0572(13) 0.0645(15) -0.0140(11) 0.0364(12) -0.0034(10) 
C12 0.0420(11) 0.0466(13) 0.0449(13) -0.0043(10) 0.0133(10) 0.0002(9) 
N2 0.0497(11) 0.0537(12) 0.0432(11) 0.0029(9) 0.0166(9) -0.0026(9) 
C18 0.0465(12) 0.0506(13) 0.0430(13) -0.0033(10) 0.0178(10) 0.0011(10) 
C17 0.0514(12) 0.0367(11) 0.0374(12) -0.0047(9) 0.0174(10) -0.0029(9) 
C4 0.0463(12) 0.0567(15) 0.0420(13) -0.0004(11) 0.0116(10) -0.0028(10) 
C21 0.0447(13) 0.0639(17) 0.0524(15) -0.0038(12) 0.0186(11) 0.0022(11) 
O5 0.0708(13) 0.130(2) 0.0583(13) 0.0038(13) 0.0410(11) -0.0045(13) 
C9 0.0468(12) 0.0546(14) 0.0461(14) 0.0020(11) 0.0139(11) -0.0048(10) 
C19 0.0557(14) 0.0540(14) 0.0372(13) 0.0015(10) 0.0156(11) -0.0002(11) 
C13 0.0555(13) 0.0399(12) 0.0555(15) -0.0010(11) 0.0263(12) -0.0002(10) 
C14 0.0557(14) 0.0460(13) 0.0533(15) -0.0063(11) 0.0228(12) 0.0024(11) 
C20 0.0543(14) 0.0610(15) 0.0438(14) -0.0056(11) 0.0256(11) -0.0098(11) 
C10 0.0625(15) 0.0418(13) 0.0562(16) -0.0006(11) 0.0155(13) -0.0042(11) 
C6 0.0557(14) 0.0506(14) 0.0557(16) -0.0018(12) 0.0232(13) -0.0001(11) 
C7 0.0609(15) 0.0464(13) 0.0502(14) 0.0025(11) 0.0165(12) -0.0028(11) 
C8 0.0594(15) 0.0527(15) 0.0497(15) -0.0010(12) 0.0180(12) -0.0046(12) 
C11 0.0581(14) 0.0434(13) 0.0541(15) -0.0054(11) 0.0171(12) 0.0004(11) 
C22 0.0529(13) 0.0482(13) 0.0419(13) 0.0004(10) 0.0162(11) 0.0014(10) 
O3 0.141(2) 0.0730(15) 0.0721(15) 0.0235(12) 0.0670(16) 0.0283(15) 
C5 0.0611(15) 0.0489(14) 0.0581(16) 0.0041(12) 0.0249(13) -0.0005(11) 
C3 0.0645(16) 0.0548(16) 0.0601(18) -0.0082(13) 0.0252(14) 0.0009(12) 
O2 0.128(2) 0.0558(13) 0.0909(17) -0.0186(12) 0.0780(16) -0.0105(12) 
C2 0.0686(17) 0.0465(14) 0.0619(17) 0.0045(12) 0.0218(14) -0.0027(12) 
C1 0.0756(19) 0.081(2) 0.0596(18) 0.0048(16) 0.0347(16) -0.0107(16) 
C16 0.0713(18) 0.0673(18) 0.073(2) -0.0217(16) 0.0354(16) 0.0035(14) 
C15 0.0781(19) 0.0706(19) 0.076(2) -0.0102(16) 0.0462(17) -0.0150(15) 
O4 0.120(2) 0.0742(16) 0.0883(19) -0.0072(14) 0.0693(18) -0.0202(15) 
O1 0.0840(16) 0.148(3) 0.0796(17) -0.0079(17) 0.0454(14) -0.0439(17) 
  
_geom_special_details 
; 
 All esds (except the esd in the dihedral angle between two l.s. planes) 
 are estimated using the full covariance matrix.  The cell esds are taken 
 into account individually in the estimation of esds in distances, angles 
 and torsion angles; correlations between esds in cell parameters are only 
 used when they are defined by crystal symmetry.  An approximate (isotropic) 
 treatment of cell esds is used for estimating esds involving l.s. planes. 
; 
  
loop_ 
 _geom_bond_atom_site_label_1 
 _geom_bond_atom_site_label_2 
 _geom_bond_distance 
 _geom_bond_site_symmetry_2 
 _geom_bond_publ_flag 
S1 O2 1.430(2) . ? 
S1 O1 1.440(3) . ? 
S1 O3 1.446(2) . ? 
S1 C17 1.764(3) . ? 
N1 C12 1.359(3) . ? 
N1 C15 1.446(4) . ? 
N1 C16 1.453(4) . ? 
C12 C11 1.408(4) . ? 
C12 C13 1.412(3) . ? 
N2 C6 1.338(3) . ? 
N2 C2 1.357(4) . ? 
N2 C1 1.467(4) . ? 
C18 C19 1.375(4) . ? 
C18 C17 1.395(4) . ? 
C17 C22 1.385(4) . ? 
C4 C5 1.380(4) . ? 
C4 C3 1.405(4) . ? 
C4 C7 1.459(4) . ? 
C21 C22 1.368(4) . ? 
C21 C20 1.385(4) . ? 
O5 C20 1.347(3) . ? 
C9 C10 1.394(4) . ? 
C9 C14 1.406(4) . ? 
C9 C8 1.455(4) . ? 
C19 C20 1.394(4) . ? 
C13 C14 1.371(4) . ? 
C10 C11 1.364(4) . ? 
C6 C5 1.367(4) . ? 
C7 C8 1.325(4) . ? 
C3 C2 1.368(4) . ? 
  
loop_ 
 _geom_angle_atom_site_label_1 
 _geom_angle_atom_site_label_2 
 _geom_angle_atom_site_label_3 
 _geom_angle 
 _geom_angle_site_symmetry_1 
 _geom_angle_site_symmetry_3 
 _geom_angle_publ_flag 
O2 S1 O1 112.72(18) . . ? 
O2 S1 O3 111.64(16) . . ? 
O1 S1 O3 112.21(18) . . ? 
O2 S1 C17 107.76(12) . . ? 
O1 S1 C17 105.71(13) . . ? 
O3 S1 C17 106.30(13) . . ? 
C12 N1 C15 122.0(2) . . ? 
C12 N1 C16 121.0(3) . . ? 
C15 N1 C16 117.0(3) . . ? 
N1 C12 C11 121.5(2) . . ? 
N1 C12 C13 121.6(2) . . ? 
C11 C12 C13 117.0(2) . . ? 
C6 N2 C2 119.0(2) . . ? 
C6 N2 C1 120.1(2) . . ? 
C2 N2 C1 120.9(2) . . ? 
C19 C18 C17 120.4(2) . . ? 
C22 C17 C18 118.9(2) . . ? 
C22 C17 S1 121.49(19) . . ? 
C18 C17 S1 119.60(19) . . ? 
C5 C4 C3 115.9(3) . . ? 
C5 C4 C7 119.5(3) . . ? 
C3 C4 C7 124.5(3) . . ? 
C22 C21 C20 120.4(2) . . ? 
C10 C9 C14 116.7(3) . . ? 
C10 C9 C8 118.4(3) . . ? 
C14 C9 C8 124.8(3) . . ? 
C18 C19 C20 120.1(2) . . ? 
C14 C13 C12 121.2(2) . . ? 
C13 C14 C9 121.6(2) . . ? 
O5 C20 C21 117.2(2) . . ? 
O5 C20 C19 123.5(3) . . ? 
C21 C20 C19 119.3(2) . . ? 
C11 C10 C9 122.5(3) . . ? 
N2 C6 C5 121.5(3) . . ? 
C8 C7 C4 124.0(3) . . ? 
C7 C8 C9 126.6(3) . . ? 
C10 C11 C12 121.0(3) . . ? 
C21 C22 C17 120.9(2) . . ? 
C6 C5 C4 121.6(3) . . ? 
C2 C3 C4 120.8(3) . . ? 
N2 C2 C3 121.2(3) . . ? 
  
loop_ 
 _geom_torsion_atom_site_label_1 
 _geom_torsion_atom_site_label_2 
 _geom_torsion_atom_site_label_3 
 _geom_torsion_atom_site_label_4 
 _geom_torsion 
 _geom_torsion_site_symmetry_1 
 _geom_torsion_site_symmetry_2 
 _geom_torsion_site_symmetry_3 
 _geom_torsion_site_symmetry_4 
 _geom_torsion_publ_flag 
C15 N1 C12 C11 176.6(3) . . . . ? 
C16 N1 C12 C11 -2.7(4) . . . . ? 
C15 N1 C12 C13 -2.9(4) . . . . ? 
C16 N1 C12 C13 177.7(2) . . . . ? 
C19 C18 C17 C22 -1.0(4) . . . . ? 
C19 C18 C17 S1 179.64(19) . . . . ? 
O2 S1 C17 C22 -98.2(2) . . . . ? 
O1 S1 C17 C22 141.1(2) . . . . ? 
O3 S1 C17 C22 21.7(3) . . . . ? 
O2 S1 C17 C18 81.2(2) . . . . ? 
O1 S1 C17 C18 -39.6(3) . . . . ? 
O3 S1 C17 C18 -159.0(2) . . . . ? 
C17 C18 C19 C20 0.0(4) . . . . ? 
N1 C12 C13 C14 -178.4(2) . . . . ? 
C11 C12 C13 C14 2.1(4) . . . . ? 
C12 C13 C14 C9 -0.3(4) . . . . ? 
C10 C9 C14 C13 -1.6(4) . . . . ? 
C8 C9 C14 C13 178.0(2) . . . . ? 
C22 C21 C20 O5 179.3(3) . . . . ? 
C22 C21 C20 C19 -2.0(4) . . . . ? 
C18 C19 C20 O5 -180.0(3) . . . . ? 
C18 C19 C20 C21 1.4(4) . . . . ? 
C14 C9 C10 C11 1.7(4) . . . . ? 
C8 C9 C10 C11 -177.9(2) . . . . ? 
C2 N2 C6 C5 -0.6(4) . . . . ? 
C1 N2 C6 C5 179.9(2) . . . . ? 
C5 C4 C7 C8 -176.8(3) . . . . ? 
C3 C4 C7 C8 0.7(4) . . . . ? 
C4 C7 C8 C9 177.2(2) . . . . ? 
C10 C9 C8 C7 174.5(3) . . . . ? 
C14 C9 C8 C7 -5.0(4) . . . . ? 
C9 C10 C11 C12 0.1(4) . . . . ? 
N1 C12 C11 C10 178.5(2) . . . . ? 
C13 C12 C11 C10 -1.9(4) . . . . ? 
C20 C21 C22 C17 1.0(4) . . . . ? 
C18 C17 C22 C21 0.5(4) . . . . ? 
S1 C17 C22 C21 179.8(2) . . . . ? 
N2 C6 C5 C4 0.1(4) . . . . ? 
C3 C4 C5 C6 0.0(4) . . . . ? 
C7 C4 C5 C6 177.7(2) . . . . ? 
C5 C4 C3 C2 0.4(4) . . . . ? 
C7 C4 C3 C2 -177.2(3) . . . . ? 
C6 N2 C2 C3 1.0(4) . . . . ? 
C1 N2 C2 C3 -179.5(3) . . . . ? 
C4 C3 C2 N2 -0.9(4) . . . . ? 
  
loop_ 
 _geom_hbond_atom_site_label_D 
 _geom_hbond_atom_site_label_H 
 _geom_hbond_atom_site_label_A 
 _geom_hbond_distance_DH 
 _geom_hbond_distance_HA 
 _geom_hbond_distance_DA 
 _geom_hbond_angle_DHA 
 _geom_hbond_site_symmetry_A 
O5 H5B O3  0.82 1.95 2.767(4) 171.2 4_556 
O5 H5B S1  0.82 2.86 3.599(3) 151.6 4_556 
O4 H4A O2  0.84(5) 2.19(5) 3.015(4) 165(5) 2_755 
O4 H4A S1  0.84(5) 2.90(6) 3.705(4) 161(4) 2_755 
  
_diffrn_measured_fraction_theta_max    0.983 
_diffrn_reflns_theta_full              27.50 
_diffrn_measured_fraction_theta_full   0.983 
_refine_diff_density_max    0.580 
_refine_diff_density_min   -0.325 
_refine_diff_density_rms    0.055 

#===END

  
data_IV 
  
_audit_creation_method            SHELXL-97 
_chemical_name_systematic 
; 
 ? 
; 
_chemical_name_common             ? 
_chemical_melting_point           ? 
_chemical_formula_moiety          ? 
_chemical_formula_sum 
 'C17 H19 F3 N2 O3 S' 
_chemical_formula_weight          388.40 
  
loop_ 
 _atom_type_symbol 
 _atom_type_description 
 _atom_type_scat_dispersion_real 
 _atom_type_scat_dispersion_imag 
 _atom_type_scat_source 
 'C'  'C'   0.0033   0.0016 
 'International Tables Vol C Tables 4.2.6.8 and 6.1.1.4' 
 'H'  'H'   0.0000   0.0000 
 'International Tables Vol C Tables 4.2.6.8 and 6.1.1.4' 
 'F'  'F'   0.0171   0.0103 
 'International Tables Vol C Tables 4.2.6.8 and 6.1.1.4' 
 'N'  'N'   0.0061   0.0033 
 'International Tables Vol C Tables 4.2.6.8 and 6.1.1.4' 
 'O'  'O'   0.0106   0.0060 
 'International Tables Vol C Tables 4.2.6.8 and 6.1.1.4' 
 'S'  'S'   0.1246   0.1234 
 'International Tables Vol C Tables 4.2.6.8 and 6.1.1.4' 
  
_symmetry_cell_setting            Monoclinic 
_symmetry_space_group_name_H-M    P2(1)/c 
  
loop_ 
 _symmetry_equiv_pos_as_xyz 
 'x, y, z' 
 '-x, y+1/2, -z+1/2' 
 '-x, -y, -z' 
 'x, -y-1/2, z-1/2' 
  
_cell_length_a                    17.500(12) 
_cell_length_b                    7.605(5) 
_cell_length_c                    13.547(9) 
_cell_angle_alpha                 90.00 
_cell_angle_beta                  93.708(13) 
_cell_angle_gamma                 90.00 
_cell_volume                      1799(2) 
_cell_formula_units_Z             4 
_cell_measurement_temperature     293(2) 
_cell_measurement_reflns_used     ? 
_cell_measurement_theta_min       ? 
_cell_measurement_theta_max       ? 
  
_exptl_crystal_description        ? 
_exptl_crystal_colour             ? 
_exptl_crystal_size_max           0.42 
_exptl_crystal_size_mid           0.31 
_exptl_crystal_size_min           0.26 
_exptl_crystal_density_meas       ? 
_exptl_crystal_density_diffrn     1.434 
_exptl_crystal_density_method     'not measured' 
_exptl_crystal_F_000              808 
_exptl_absorpt_coefficient_mu     0.229 
_exptl_absorpt_correction_type    none 
_exptl_absorpt_correction_T_min   0.9099 
_exptl_absorpt_correction_T_max   0.9428 
_exptl_absorpt_process_details    ? 
  
_exptl_special_details 
; 
 ? 
; 
  
_diffrn_ambient_temperature       293(2) 
_diffrn_radiation_wavelength      0.71073 
_diffrn_radiation_type            MoK\a 
_diffrn_radiation_source          'fine-focus sealed tube' 
_diffrn_radiation_monochromator   graphite 
_diffrn_measurement_device_type   'Bruker P4' 
_diffrn_measurement_method        '\w scans' 
_diffrn_detector_area_resol_mean  ? 
_diffrn_standards_number          ? 
_diffrn_standards_interval_count  ? 
_diffrn_standards_interval_time   ? 
_diffrn_standards_decay_%         ? 
_diffrn_reflns_number             13410 
_diffrn_reflns_av_R_equivalents   0.0297 
_diffrn_reflns_av_sigmaI/netI     0.0282 
_diffrn_reflns_limit_h_min        -22 
_diffrn_reflns_limit_h_max        22 
_diffrn_reflns_limit_k_min        -8 
_diffrn_reflns_limit_k_max        9 
_diffrn_reflns_limit_l_min        -17 
_diffrn_reflns_limit_l_max        17 
_diffrn_reflns_theta_min          2.33 
_diffrn_reflns_theta_max          27.41 
_reflns_number_total              4072 
_reflns_number_gt                 3414 
_reflns_threshold_expression      >2sigma(I) 
  
_computing_data_collection        'Bruker XSCANS' 
_computing_cell_refinement        'Bruker XSCANS' 
_computing_data_reduction         'Bruker SHELXTL' 
_computing_structure_solution     'SHELXS-97 (Sheldrick, 1990)' 
_computing_structure_refinement   'SHELXL-97 (Sheldrick, 1997)' 
_computing_molecular_graphics     'Bruker SHELXTL' 
_computing_publication_material   'Bruker SHELXTL' 
  
_refine_special_details 
; 
 Refinement of F^2^ against ALL reflections.  The weighted R-factor wR and 
 goodness of fit S are based on F^2^, conventional R-factors R are based 
 on F, with F set to zero for negative F^2^. The threshold expression of 
 F^2^ > 2sigma(F^2^) is used only for calculating R-factors(gt) etc. and is 
 not relevant to the choice of reflections for refinement.  R-factors based 
 on F^2^ are statistically about twice as large as those based on F, and R- 
 factors based on ALL data will be even larger. 
; 
  
_refine_ls_structure_factor_coef  Fsqd 
_refine_ls_matrix_type            full 
_refine_ls_weighting_scheme       calc 
_refine_ls_weighting_details 
 'calc w=1/[\s^2^(Fo^2^)+(0.0514P)^2^+0.3930P] where P=(Fo^2^+2Fc^2^)/3' 
_atom_sites_solution_primary      direct 
_atom_sites_solution_secondary    difmap 
_atom_sites_solution_hydrogens    geom 
_refine_ls_hydrogen_treatment     CONSTR 
_refine_ls_extinction_method      none 
_refine_ls_extinction_coef        ? 
_refine_ls_number_reflns          4072 
_refine_ls_number_parameters      238 
_refine_ls_number_restraints      0 
_refine_ls_R_factor_all           0.0728 
_refine_ls_R_factor_gt            0.0578 
_refine_ls_wR_factor_ref          0.1321 
_refine_ls_wR_factor_gt           0.1230 
_refine_ls_goodness_of_fit_ref    1.145 
_refine_ls_restrained_S_all       1.145 
_refine_ls_shift/su_max           0.000 
_refine_ls_shift/su_mean          0.000 
  
loop_ 
 _atom_site_label 
 _atom_site_type_symbol 
 _atom_site_fract_x 
 _atom_site_fract_y 
 _atom_site_fract_z 
 _atom_site_U_iso_or_equiv 
 _atom_site_adp_type 
 _atom_site_occupancy 
 _atom_site_symmetry_multiplicity 
 _atom_site_calc_flag 
 _atom_site_refinement_flags 
 _atom_site_disorder_assembly 
 _atom_site_disorder_group 
N1 N 0.61763(10) 0.6687(3) 0.71436(13) 0.0568(5) Uani 1 1 d . . . 
N2 N 0.09435(10) 0.7062(2) 0.24959(13) 0.0521(4) Uani 1 1 d . . . 
C1 C 0.62741(15) 0.5776(4) 0.80846(18) 0.0718(7) Uani 1 1 d . . . 
H1A H 0.6177 0.4545 0.7986 0.108 Uiso 1 1 calc R . . 
H1B H 0.5921 0.6243 0.8531 0.108 Uiso 1 1 calc R . . 
H1C H 0.6789 0.5940 0.8359 0.108 Uiso 1 1 calc R . . 
C2 C 0.68409(13) 0.7523(3) 0.67631(19) 0.0654(6) Uani 1 1 d . . . 
H2A H 0.6951 0.6987 0.6147 0.098 Uiso 1 1 calc R . . 
H2B H 0.7273 0.7384 0.7230 0.098 Uiso 1 1 calc R . . 
H2C H 0.6739 0.8752 0.6661 0.098 Uiso 1 1 calc R . . 
C3 C 0.54917(11) 0.6641(3) 0.65972(15) 0.0474(5) Uani 1 1 d . . . 
C4 C 0.48568(12) 0.5700(3) 0.69086(15) 0.0519(5) Uani 1 1 d . . . 
H4A H 0.4899 0.5089 0.7504 0.062 Uiso 1 1 calc R . . 
C5 C 0.41763(12) 0.5672(3) 0.63434(15) 0.0514(5) Uani 1 1 d . . . 
H5A H 0.3771 0.5027 0.6568 0.062 Uiso 1 1 calc R . . 
C6 C 0.40667(11) 0.6571(3) 0.54462(15) 0.0472(5) Uani 1 1 d . . . 
C7 C 0.47027(12) 0.7501(3) 0.51394(16) 0.0524(5) Uani 1 1 d . . . 
H7A H 0.4657 0.8110 0.4543 0.063 Uiso 1 1 calc R . . 
C8 C 0.53874(12) 0.7543(3) 0.56887(16) 0.0529(5) Uani 1 1 d . . . 
H8A H 0.5793 0.8181 0.5458 0.063 Uiso 1 1 calc R . . 
C9 C 0.33357(12) 0.6497(3) 0.48893(16) 0.0501(5) Uani 1 1 d . . . 
H9A H 0.2949 0.5898 0.5188 0.060 Uiso 1 1 calc R . . 
C10 C 0.31436(12) 0.7180(3) 0.39991(16) 0.0529(5) Uani 1 1 d . . . 
H10B H 0.3525 0.7752 0.3675 0.063 Uiso 1 1 calc R . . 
C11 C 0.23833(12) 0.7097(3) 0.34970(15) 0.0481(5) Uani 1 1 d . . . 
C12 C 0.17477(12) 0.6343(3) 0.39086(16) 0.0527(5) Uani 1 1 d . . . 
H12B H 0.1804 0.5830 0.4532 0.063 Uiso 1 1 calc R . . 
C13 C 0.10468(12) 0.6352(3) 0.34070(16) 0.0559(5) Uani 1 1 d . . . 
H13B H 0.0631 0.5858 0.3699 0.067 Uiso 1 1 calc R . . 
C14 C 0.15404(14) 0.7774(3) 0.20776(17) 0.0597(6) Uani 1 1 d . . . 
H14B H 0.1470 0.8252 0.1446 0.072 Uiso 1 1 calc R . . 
C15 C 0.22485(14) 0.7817(3) 0.25526(17) 0.0609(6) Uani 1 1 d . . . 
H15B H 0.2651 0.8335 0.2243 0.073 Uiso 1 1 calc R . . 
C16 C 0.01906(13) 0.6959(4) 0.19449(19) 0.0720(7) Uani 1 1 d . . . 
H16D H 0.0184 0.7731 0.1384 0.108 Uiso 1 1 calc R . . 
H16E H -0.0202 0.7305 0.2369 0.108 Uiso 1 1 calc R . . 
H16F H 0.0099 0.5774 0.1723 0.108 Uiso 1 1 calc R . . 
S1 S 0.14035(3) 0.23084(7) 0.09559(4) 0.05081(18) Uani 1 1 d . . . 
F1 F 0.15116(9) 0.3235(3) -0.08960(11) 0.0952(5) Uani 1 1 d . . . 
F2 F 0.08824(9) 0.5035(2) -0.00609(12) 0.0924(5) Uani 1 1 d . . . 
F3 F 0.21034(10) 0.4916(2) 0.01619(14) 0.1018(6) Uani 1 1 d . . . 
O1 O 0.07393(10) 0.1311(3) 0.06283(15) 0.0855(6) Uani 1 1 d . . . 
O2 O 0.13280(11) 0.3352(2) 0.18227(12) 0.0748(5) Uani 1 1 d . . . 
O3 O 0.21099(9) 0.1353(2) 0.09327(12) 0.0653(4) Uani 1 1 d . . . 
C17 C 0.14810(13) 0.3952(3) -0.00030(17) 0.0609(6) Uani 1 1 d . . . 
  
loop_ 
 _atom_site_aniso_label 
 _atom_site_aniso_U_11 
 _atom_site_aniso_U_22 
 _atom_site_aniso_U_33 
 _atom_site_aniso_U_23 
 _atom_site_aniso_U_13 
 _atom_site_aniso_U_12 
N1 0.0510(10) 0.0680(12) 0.0512(10) 0.0020(9) 0.0009(8) -0.0013(9) 
N2 0.0512(10) 0.0479(10) 0.0567(11) -0.0078(8) -0.0007(8) 0.0051(8) 
C1 0.0707(16) 0.0809(18) 0.0624(15) 0.0088(13) -0.0061(12) 0.0053(14) 
C2 0.0537(13) 0.0703(16) 0.0716(16) -0.0032(12) -0.0008(11) -0.0096(11) 
C3 0.0510(11) 0.0441(11) 0.0476(11) -0.0049(9) 0.0061(9) 0.0022(9) 
C4 0.0591(12) 0.0496(12) 0.0477(12) 0.0032(9) 0.0091(9) 0.0002(10) 
C5 0.0514(12) 0.0491(12) 0.0549(12) 0.0020(9) 0.0130(9) -0.0044(9) 
C6 0.0489(11) 0.0430(11) 0.0500(12) -0.0051(9) 0.0070(9) -0.0002(9) 
C7 0.0566(12) 0.0526(13) 0.0480(11) 0.0048(9) 0.0049(9) -0.0047(10) 
C8 0.0506(12) 0.0562(13) 0.0523(12) 0.0025(10) 0.0080(9) -0.0081(10) 
C9 0.0524(12) 0.0444(12) 0.0543(12) -0.0044(9) 0.0094(9) -0.0042(9) 
C10 0.0520(12) 0.0512(12) 0.0560(13) -0.0001(10) 0.0082(10) -0.0062(10) 
C11 0.0530(12) 0.0412(11) 0.0502(11) -0.0045(9) 0.0046(9) -0.0029(9) 
C12 0.0578(13) 0.0533(13) 0.0470(12) -0.0002(9) 0.0039(9) -0.0056(10) 
C13 0.0546(13) 0.0595(14) 0.0544(13) -0.0075(10) 0.0106(10) -0.0071(10) 
C14 0.0685(15) 0.0550(14) 0.0551(13) 0.0101(10) 0.0005(11) -0.0052(11) 
C15 0.0606(14) 0.0632(15) 0.0590(14) 0.0090(11) 0.0058(11) -0.0116(11) 
C16 0.0530(14) 0.0856(18) 0.0759(17) -0.0094(14) -0.0070(12) 0.0098(13) 
S1 0.0513(3) 0.0497(3) 0.0520(3) -0.0030(2) 0.0077(2) -0.0015(2) 
F1 0.0940(12) 0.1414(15) 0.0507(9) 0.0062(9) 0.0101(8) 0.0181(11) 
F2 0.0907(11) 0.0925(11) 0.0931(11) 0.0213(9) -0.0002(9) 0.0345(9) 
F3 0.0855(11) 0.1026(13) 0.1148(13) 0.0431(11) -0.0120(9) -0.0373(10) 
O1 0.0615(10) 0.0847(13) 0.1104(15) -0.0068(11) 0.0070(10) -0.0265(9) 
O2 0.1014(13) 0.0719(11) 0.0528(10) -0.0091(8) 0.0167(9) 0.0120(10) 
O3 0.0619(10) 0.0647(10) 0.0691(10) -0.0021(8) 0.0024(8) 0.0161(8) 
C17 0.0517(13) 0.0755(16) 0.0550(14) 0.0046(11) -0.0002(10) 0.0045(11) 
  
_geom_special_details 
; 
 All esds (except the esd in the dihedral angle between two l.s. planes) 
 are estimated using the full covariance matrix.  The cell esds are taken 
 into account individually in the estimation of esds in distances, angles 
 and torsion angles; correlations between esds in cell parameters are only 
 used when they are defined by crystal symmetry.  An approximate (isotropic) 
 treatment of cell esds is used for estimating esds involving l.s. planes. 
; 
  
loop_ 
 _geom_bond_atom_site_label_1 
 _geom_bond_atom_site_label_2 
 _geom_bond_distance 
 _geom_bond_site_symmetry_2 
 _geom_bond_publ_flag 
N1 C3 1.367(3) . ? 
N1 C2 1.449(3) . ? 
N1 C1 1.451(3) . ? 
N2 C14 1.335(3) . ? 
N2 C13 1.349(3) . ? 
N2 C16 1.474(3) . ? 
C1 H1A 0.9600 . ? 
C1 H1B 0.9600 . ? 
C1 H1C 0.9600 . ? 
C2 H2A 0.9600 . ? 
C2 H2B 0.9600 . ? 
C2 H2C 0.9600 . ? 
C3 C4 1.409(3) . ? 
C3 C8 1.411(3) . ? 
C4 C5 1.374(3) . ? 
C4 H4A 0.9300 . ? 
C5 C6 1.397(3) . ? 
C5 H5A 0.9300 . ? 
C6 C7 1.404(3) . ? 
C6 C9 1.444(3) . ? 
C7 C8 1.369(3) . ? 
C7 H7A 0.9300 . ? 
C8 H8A 0.9300 . ? 
C9 C10 1.336(3) . ? 
C9 H9A 0.9300 . ? 
C10 C11 1.456(3) . ? 
C10 H10B 0.9300 . ? 
C11 C15 1.398(3) . ? 
C11 C12 1.399(3) . ? 
C12 C13 1.363(3) . ? 
C12 H12B 0.9300 . ? 
C13 H13B 0.9300 . ? 
C14 C15 1.359(3) . ? 
C14 H14B 0.9300 . ? 
C15 H15B 0.9300 . ? 
C16 H16D 0.9600 . ? 
C16 H16E 0.9600 . ? 
C16 H16F 0.9600 . ? 
S1 O2 1.4306(18) . ? 
S1 O1 1.4343(18) . ? 
S1 O3 1.4359(17) . ? 
S1 C17 1.814(3) . ? 
F1 C17 1.331(3) . ? 
F2 C17 1.331(3) . ? 
F3 C17 1.320(3) . ? 
  
loop_ 
 _geom_angle_atom_site_label_1 
 _geom_angle_atom_site_label_2 
 _geom_angle_atom_site_label_3 
 _geom_angle 
 _geom_angle_site_symmetry_1 
 _geom_angle_site_symmetry_3 
 _geom_angle_publ_flag 
C3 N1 C2 120.92(19) . . ? 
C3 N1 C1 120.86(19) . . ? 
C2 N1 C1 118.04(19) . . ? 
C14 N2 C13 119.25(19) . . ? 
C14 N2 C16 120.3(2) . . ? 
C13 N2 C16 120.3(2) . . ? 
N1 C1 H1A 109.5 . . ? 
N1 C1 H1B 109.5 . . ? 
H1A C1 H1B 109.5 . . ? 
N1 C1 H1C 109.5 . . ? 
H1A C1 H1C 109.5 . . ? 
H1B C1 H1C 109.5 . . ? 
N1 C2 H2A 109.5 . . ? 
N1 C2 H2B 109.5 . . ? 
H2A C2 H2B 109.5 . . ? 
N1 C2 H2C 109.5 . . ? 
H2A C2 H2C 109.5 . . ? 
H2B C2 H2C 109.5 . . ? 
N1 C3 C4 122.1(2) . . ? 
N1 C3 C8 121.29(19) . . ? 
C4 C3 C8 116.63(19) . . ? 
C5 C4 C3 120.9(2) . . ? 
C5 C4 H4A 119.6 . . ? 
C3 C4 H4A 119.6 . . ? 
C4 C5 C6 122.88(19) . . ? 
C4 C5 H5A 118.6 . . ? 
C6 C5 H5A 118.6 . . ? 
C5 C6 C7 115.93(19) . . ? 
C5 C6 C9 120.19(19) . . ? 
C7 C6 C9 123.9(2) . . ? 
C8 C7 C6 122.2(2) . . ? 
C8 C7 H7A 118.9 . . ? 
C6 C7 H7A 118.9 . . ? 
C7 C8 C3 121.48(19) . . ? 
C7 C8 H8A 119.3 . . ? 
C3 C8 H8A 119.3 . . ? 
C10 C9 C6 128.3(2) . . ? 
C10 C9 H9A 115.9 . . ? 
C6 C9 H9A 115.9 . . ? 
C9 C10 C11 125.0(2) . . ? 
C9 C10 H10B 117.5 . . ? 
C11 C10 H10B 117.5 . . ? 
C15 C11 C12 115.7(2) . . ? 
C15 C11 C10 120.38(19) . . ? 
C12 C11 C10 123.9(2) . . ? 
C13 C12 C11 120.8(2) . . ? 
C13 C12 H12B 119.6 . . ? 
C11 C12 H12B 119.6 . . ? 
N2 C13 C12 121.4(2) . . ? 
N2 C13 H13B 119.3 . . ? 
C12 C13 H13B 119.3 . . ? 
N2 C14 C15 121.6(2) . . ? 
N2 C14 H14B 119.2 . . ? 
C15 C14 H14B 119.2 . . ? 
C14 C15 C11 121.2(2) . . ? 
C14 C15 H15B 119.4 . . ? 
C11 C15 H15B 119.4 . . ? 
N2 C16 H16D 109.5 . . ? 
N2 C16 H16E 109.5 . . ? 
H16D C16 H16E 109.5 . . ? 
N2 C16 H16F 109.5 . . ? 
H16D C16 H16F 109.5 . . ? 
H16E C16 H16F 109.5 . . ? 
O2 S1 O1 115.56(12) . . ? 
O2 S1 O3 115.10(11) . . ? 
O1 S1 O3 114.03(12) . . ? 
O2 S1 C17 102.74(12) . . ? 
O1 S1 C17 103.86(12) . . ? 
O3 S1 C17 103.22(11) . . ? 
F3 C17 F2 107.7(2) . . ? 
F3 C17 F1 107.5(2) . . ? 
F2 C17 F1 106.12(19) . . ? 
F3 C17 S1 111.14(16) . . ? 
F2 C17 S1 111.94(16) . . ? 
F1 C17 S1 112.20(19) . . ? 
  
loop_ 
 _geom_torsion_atom_site_label_1 
 _geom_torsion_atom_site_label_2 
 _geom_torsion_atom_site_label_3 
 _geom_torsion_atom_site_label_4 
 _geom_torsion 
 _geom_torsion_site_symmetry_1 
 _geom_torsion_site_symmetry_2 
 _geom_torsion_site_symmetry_3 
 _geom_torsion_site_symmetry_4 
 _geom_torsion_publ_flag 
C2 N1 C3 C4 174.0(2) . . . . ? 
C1 N1 C3 C4 -0.9(3) . . . . ? 
C2 N1 C3 C8 -6.0(3) . . . . ? 
C1 N1 C3 C8 179.0(2) . . . . ? 
N1 C3 C4 C5 -179.8(2) . . . . ? 
C8 C3 C4 C5 0.3(3) . . . . ? 
C3 C4 C5 C6 -0.7(3) . . . . ? 
C4 C5 C6 C7 0.9(3) . . . . ? 
C4 C5 C6 C9 -179.7(2) . . . . ? 
C5 C6 C7 C8 -0.6(3) . . . . ? 
C9 C6 C7 C8 179.9(2) . . . . ? 
C6 C7 C8 C3 0.3(3) . . . . ? 
N1 C3 C8 C7 -180.0(2) . . . . ? 
C4 C3 C8 C7 -0.1(3) . . . . ? 
C5 C6 C9 C10 -175.6(2) . . . . ? 
C7 C6 C9 C10 3.8(3) . . . . ? 
C6 C9 C10 C11 -177.9(2) . . . . ? 
C9 C10 C11 C15 -178.3(2) . . . . ? 
C9 C10 C11 C12 2.7(3) . . . . ? 
C15 C11 C12 C13 -0.8(3) . . . . ? 
C10 C11 C12 C13 178.3(2) . . . . ? 
C14 N2 C13 C12 -0.1(3) . . . . ? 
C16 N2 C13 C12 176.3(2) . . . . ? 
C11 C12 C13 N2 0.9(3) . . . . ? 
C13 N2 C14 C15 -0.7(3) . . . . ? 
C16 N2 C14 C15 -177.1(2) . . . . ? 
N2 C14 C15 C11 0.7(4) . . . . ? 
C12 C11 C15 C14 0.0(3) . . . . ? 
C10 C11 C15 C14 -179.1(2) . . . . ? 
O2 S1 C17 F3 63.4(2) . . . . ? 
O1 S1 C17 F3 -175.87(18) . . . . ? 
O3 S1 C17 F3 -56.6(2) . . . . ? 
O2 S1 C17 F2 -57.1(2) . . . . ? 
O1 S1 C17 F2 63.7(2) . . . . ? 
O3 S1 C17 F2 -177.07(17) . . . . ? 
O2 S1 C17 F1 -176.28(16) . . . . ? 
O1 S1 C17 F1 -55.52(19) . . . . ? 
O3 S1 C17 F1 63.74(18) . . . . ? 
  
_diffrn_measured_fraction_theta_max    0.994 
_diffrn_reflns_theta_full              27.41 
_diffrn_measured_fraction_theta_full   0.994 
_refine_diff_density_max    0.163 
_refine_diff_density_min   -0.239 
_refine_diff_density_rms    0.036 

#===END
